# Supplementary material for: Determination of copolymer compositions in polyhydroxyalkanoates using 1H benchtop nuclear magnetic resonance spectroscopy
Source: Royal Society of Chemistry journal article supplement (doi:10.1039/d3ay00846k), 2023-01-01
Supplement: d3ay00846k1.pdf [file d3ay00846k1.pdf]

## Supporting Information for

# Determination of Copolymer Compositions in Polyhydroxyalkanoates Using $^1\text{H}$ Benchtop Nuclear Magnetic Resonance Spectroscopy

Juan F. Araneda,<sup>a</sup> Hasitha de Alwis Weerasesera,<sup>b</sup> Matthew C. Leclerc,<sup>\*a</sup> Sharmaine B. Luk,<sup>b</sup> and Susanne D. Riegel<sup>a</sup>

<sup>a</sup>*Nanalysis Corp., 1-4600 5 St NE, Calgary, AB, Canada T2E 7C3*

<sup>b</sup>*Genecis Bioindustries, 1100-700 Bay St, Toronto, ON, Canada M5G 1Z6*

*\*Corresponding author: [matt.leclerc@nanalysis.com](mailto:matt.leclerc@nanalysis.com)*

Table S1. Summary of monomeric ratios obtained for PHBV1 using <sup>1</sup>H NMR at 60 MHz, 100 MHz, and 400 MHz. The ratios are shown both as mol% and wt%. Three assays were prepared and analyzed for each polymer. The averages of triplicate analyses are included for each assay, in addition to the relative standard deviations (RSD).

| PHBV1   | 60 MHz |      |      |      | 100 MHz |      |      |      | 400 MHz |      |      |      |
|---------|--------|------|------|------|---------|------|------|------|---------|------|------|------|
|         | mol%   |      | wt%  |      | mol%    |      | wt%  |      | mol%    |      | wt%  |      |
|         | 3HB    | 3HV  | 3HB  | 3HV  | 3HB     | 3HV  | 3HB  | 3HV  | 3HB     | 3HV  | 3HB  | 3HV  |
| Assay 1 | 94.7   | 5.3  | 93.9 | 6.1  | 96.4    | 3.6  | 95.8 | 4.2  | 96.6    | 3.4  | 96.1 | 3.9  |
|         | 94.8   | 5.2  | 94.0 | 6.0  | 96.2    | 3.8  | 95.6 | 4.4  | 96.6    | 3.4  | 96.1 | 3.9  |
|         | 94.1   | 5.9  | 93.2 | 6.8  | 96.3    | 3.7  | 95.7 | 4.3  | 96.6    | 3.4  | 96.1 | 3.9  |
| Average | 94.5   | 5.5  | 93.7 | 6.3  | 96.3    | 3.7  | 95.7 | 4.3  | 96.6    | 3.4  | 96.1 | 3.9  |
| RSD     | 0.3%   | 5.7% | 0.4% | 5.6% | 0.1%    | 2.2% | 0.1% | 2.2% | 0.0%    | 0.0% | 0.0% | 0.0% |
| Assay 2 | 94.9   | 5.1  | 94.1 | 5.9  | 96.9    | 3.1  | 96.4 | 3.6  | 96.6    | 3.4  | 96.1 | 3.9  |
|         | 95.2   | 4.8  | 94.5 | 5.5  | 96.7    | 3.3  | 96.2 | 3.8  | 96.6    | 3.4  | 96.1 | 3.9  |
|         | 94.9   | 5.1  | 94.1 | 5.9  | 96.4    | 3.6  | 95.8 | 4.2  | 96.6    | 3.4  | 96.1 | 3.9  |
| Average | 95.0   | 5.0  | 94.2 | 5.8  | 96.7    | 3.3  | 96.1 | 3.9  | 96.6    | 3.4  | 96.1 | 3.9  |
| RSD     | 0.1%   | 2.8% | 0.2% | 2.8% | 0.2%    | 6.2% | 0.2% | 6.1% | 0.0%    | 0.0% | 0.0% | 0.0% |
| Assay 3 | 93.5   | 6.5  | 92.5 | 7.5  | 96.2    | 3.8  | 95.6 | 4.4  | 96.7    | 3.3  | 96.2 | 3.8  |
|         | 94.2   | 5.8  | 93.3 | 6.7  | 96.3    | 3.7  | 95.7 | 4.3  | 96.7    | 3.3  | 96.2 | 3.8  |
|         | 93.9   | 6.1  | 93.0 | 7.0  | 96.2    | 3.8  | 95.6 | 4.4  | 96.6    | 3.4  | 96.1 | 3.9  |
| Average | 93.9   | 6.1  | 92.9 | 7.1  | 96.2    | 3.8  | 95.7 | 4.3  | 96.7    | 3.3  | 96.1 | 3.9  |
| RSD     | 0.3%   | 4.7% | 0.4% | 4.6% | 0.0%    | 1.3% | 0.1% | 1.2% | 0.0%    | 1.4% | 0.1% | 1.4% |

Table S2. Summary of monomeric ratios obtained for PHBV2 using <sup>1</sup>H NMR at 60 MHz, 100 MHz, and 400 MHz. The ratios are shown both as mol% and wt%. Three assays were prepared and analyzed for each polymer. The averages of triplicate analyses are included for each assay, in addition to the relative standard deviations (RSD).

| PHBV2   | 60 MHz |      |      |      | 100 MHz |      |      |      | 400 MHz |      |      |      |
|---------|--------|------|------|------|---------|------|------|------|---------|------|------|------|
|         | mol%   |      | wt%  |      | mol%    |      | wt%  |      | mol%    |      | wt%  |      |
|         | 3HB    | 3HV  | 3HB  | 3HV  | 3HB     | 3HV  | 3HB  | 3HV  | 3HB     | 3HV  | 3HB  | 3HV  |
| Assay 1 | 73.7   | 26.3 | 70.7 | 29.3 | 74.2    | 25.8 | 71.2 | 28.8 | 74.0    | 26.0 | 71.0 | 29.0 |
|         | 73.3   | 26.7 | 70.3 | 29.7 | 74.1    | 25.9 | 71.1 | 28.9 | 74.0    | 26.0 | 71.0 | 29.0 |
|         | 74.0   | 26.0 | 71.0 | 29.0 | 74.0    | 26.0 | 71.0 | 29.0 | 74.0    | 26.0 | 71.0 | 29.0 |
| Average | 73.7   | 26.3 | 70.7 | 29.3 | 74.1    | 25.9 | 71.1 | 28.9 | 74.0    | 26.0 | 71.0 | 29.0 |
| RSD     | 0.4%   | 1.1% | 0.4% | 1.0% | 0.1%    | 0.3% | 0.1% | 0.3% | 0.0%    | 0.0% | 0.0% | 0.0% |
| Assay 2 | 74.0   | 26.0 | 71.0 | 29.0 | 74.3    | 25.7 | 71.3 | 28.7 | 74.0    | 26.0 | 71.0 | 29.0 |
|         | 74.0   | 26.0 | 71.0 | 29.0 | 73.8    | 26.2 | 70.8 | 29.2 | 74.0    | 26.0 | 71.0 | 29.0 |
|         | 73.5   | 26.5 | 70.5 | 29.5 | 73.9    | 26.1 | 70.9 | 29.1 | 73.9    | 26.1 | 70.9 | 29.1 |
| Average | 73.8   | 26.2 | 70.8 | 29.2 | 74.0    | 26.0 | 71.0 | 29.0 | 74.0    | 26.0 | 71.0 | 29.0 |
| RSD     | 0.3%   | 0.9% | 0.4% | 0.9% | 0.3%    | 0.8% | 0.3% | 0.8% | 0.1%    | 0.2% | 0.1% | 0.2% |
| Assay 3 | 72.3   | 27.7 | 69.2 | 30.8 | 74.4    | 25.6 | 71.4 | 28.6 | 74.0    | 26.0 | 71.0 | 29.0 |
|         | 72.6   | 27.4 | 69.5 | 30.5 | 74.8    | 25.2 | 71.9 | 28.1 | 74.0    | 26.0 | 71.0 | 29.0 |
|         | 73.5   | 26.5 | 70.5 | 29.5 | 74.4    | 25.6 | 71.4 | 28.6 | 74.1    | 25.9 | 71.1 | 28.9 |
| Average | 72.8   | 27.2 | 69.7 | 30.3 | 74.5    | 25.5 | 71.6 | 28.4 | 74.0    | 26.0 | 71.1 | 28.9 |
| RSD     | 0.7%   | 1.9% | 0.8% | 1.8% | 0.3%    | 0.7% | 0.3% | 0.7% | 0.1%    | 0.2% | 0.1% | 0.2% |

Table S3. Summary of monomeric ratios obtained for PHBV3 using <sup>1</sup>H NMR at 60 MHz, 100 MHz, and 400 MHz. The ratios are shown both as mol% and wt%. Three assays were prepared and analyzed for each polymer. The averages of triplicate analyses are included for each assay, in addition to the relative standard deviations (RSD).

| PHBV3   | 60 MHz |      |      |      | 100 MHz |      |      |      | 400 MHz |      |      |      |
|---------|--------|------|------|------|---------|------|------|------|---------|------|------|------|
|         | mol%   |      | wt%  |      | mol%    |      | wt%  |      | mol%    |      | wt%  |      |
|         | 3HB    | 3HV  | 3HB  | 3HV  | 3HB     | 3HV  | 3HB  | 3HV  | 3HB     | 3HV  | 3HB  | 3HV  |
| Assay 1 | 97.1   | 2.9  | 96.6 | 3.4  | 92.3    | 7.7  | 91.2 | 8.8  | 92.6    | 7.4  | 91.5 | 8.5  |
|         | 97.5   | 2.5  | 97.1 | 2.9  | 92.4    | 7.6  | 91.3 | 8.7  | 92.6    | 7.4  | 91.5 | 8.5  |
|         | 97.5   | 2.5  | 97.1 | 2.9  | 92.7    | 7.3  | 91.6 | 8.4  | 92.7    | 7.3  | 91.6 | 8.4  |
| Average | 97.4   | 2.6  | 97.0 | 3.0  | 92.5    | 7.5  | 91.4 | 8.6  | 92.6    | 7.4  | 91.5 | 8.5  |
| RSD     | 0.2%   | 7.2% | 0.2% | 7.1% | 0.2%    | 2.3% | 0.2% | 2.2% | 0.1%    | 0.6% | 0.1% | 0.6% |
| Assay 2 | 97.6   | 2.4  | 97.2 | 2.8  | 92.7    | 7.3  | 91.6 | 8.4  | 92.6    | 7.4  | 91.5 | 8.5  |
|         | 97.0   | 3.0  | 96.5 | 3.5  | 92.3    | 7.7  | 91.2 | 8.8  | 92.6    | 7.4  | 91.5 | 8.5  |
|         | 97.2   | 2.8  | 96.8 | 3.2  | 92.3    | 7.7  | 91.2 | 8.8  | 92.6    | 7.4  | 91.5 | 8.5  |
| Average | 97.3   | 2.7  | 96.8 | 3.2  | 92.4    | 7.6  | 91.3 | 8.7  | 92.6    | 7.4  | 91.5 | 8.5  |
| RSD     | 0.3%   | 9.1% | 0.3% | 9.1% | 0.2%    | 2.5% | 0.2% | 2.5% | 0.0%    | 0.0% | 0.0% | 0.0% |
| Assay 3 | 97.0   | 3.0  | 96.5 | 3.5  | 92.4    | 7.6  | 91.3 | 8.7  | 92.5    | 7.5  | 91.4 | 8.6  |
|         | 97.2   | 2.8  | 96.8 | 3.2  | 92.4    | 7.6  | 91.3 | 8.7  | 92.6    | 7.4  | 91.5 | 8.5  |
|         | 97.1   | 2.9  | 96.6 | 3.4  | 92.6    | 7.4  | 91.5 | 8.5  | 92.6    | 7.4  | 91.5 | 8.5  |
| Average | 97.1   | 2.9  | 96.6 | 3.4  | 92.5    | 7.5  | 91.4 | 8.6  | 92.6    | 7.4  | 91.5 | 8.5  |
| RSD     | 0.1%   | 2.8% | 0.1% | 2.8% | 0.1%    | 1.3% | 0.1% | 1.2% | 0.1%    | 0.6% | 0.1% | 0.6% |

Table S4. Summary of monomeric ratios obtained for PHBV4 using <sup>1</sup>H NMR at 60 MHz, 100 MHz, and 400 MHz. The ratios are shown both as mol% and wt%. Three assays were prepared and analyzed for each polymer. The averages of triplicate analyses are included for each assay, in addition to the relative standard deviations (RSD).

| PHBV4   | 60 MHz |       |      |       | 100 MHz |      |      |      | 400 MHz |      |      |      |
|---------|--------|-------|------|-------|---------|------|------|------|---------|------|------|------|
|         | mol%   |       | wt%  |       | mol%    |      | wt%  |      | mol%    |      | wt%  |      |
|         | 3HB    | 3HV   | 3HB  | 3HV   | 3HB     | 3HV  | 3HB  | 3HV  | 3HB     | 3HV  | 3HB  | 3HV  |
| Assay 1 | 94.9   | 5.1   | 94.1 | 5.9   | 85.2    | 14.8 | 83.2 | 16.8 | 85.5    | 14.5 | 83.5 | 16.5 |
|         | 93.8   | 6.2   | 92.9 | 7.1   | 85.5    | 14.5 | 83.5 | 16.5 | 85.3    | 14.7 | 83.3 | 16.7 |
|         | 94.9   | 5.1   | 94.1 | 5.9   | 85.1    | 14.9 | 83.1 | 16.9 | 85.5    | 14.5 | 83.5 | 16.5 |
| Average | 94.5   | 5.5   | 93.7 | 6.3   | 85.3    | 14.7 | 83.3 | 16.7 | 85.4    | 14.6 | 83.5 | 16.5 |
| RSD     | 0.5%   | 9.5%  | 0.6% | 9.4%  | 0.2%    | 1.2% | 0.2% | 1.1% | 0.1%    | 0.6% | 0.1% | 0.6% |
| Assay 2 | 95.6   | 4.4   | 94.9 | 5.1   | 85.6    | 14.4 | 83.7 | 16.3 | 85.4    | 14.6 | 83.4 | 16.6 |
|         | 94.0   | 6.0   | 93.1 | 6.9   | 84.7    | 15.3 | 82.7 | 17.3 | 85.4    | 14.6 | 83.4 | 16.6 |
|         | 94.3   | 5.7   | 93.4 | 6.6   | 85.8    | 14.2 | 83.9 | 16.1 | 85.4    | 14.6 | 83.4 | 16.6 |
| Average | 94.6   | 5.4   | 93.8 | 6.2   | 85.4    | 14.6 | 83.4 | 16.6 | 85.4    | 14.6 | 83.4 | 16.6 |
| RSD     | 0.7%   | 12.9% | 0.8% | 12.8% | 0.6%    | 3.3% | 0.6% | 3.2% | 0.0%    | 0.0% | 0.0% | 0.0% |
| Assay 3 | 93.8   | 6.2   | 92.9 | 7.1   | 85.3    | 14.7 | 83.3 | 16.7 | 85.5    | 14.5 | 83.5 | 16.5 |
|         | 94.4   | 5.6   | 93.6 | 6.4   | 85.0    | 15.0 | 83.0 | 17.0 | 85.5    | 14.5 | 83.5 | 16.5 |
|         | 93.8   | 6.2   | 92.9 | 7.1   | 84.7    | 15.3 | 82.7 | 17.3 | 85.5    | 14.5 | 83.5 | 16.5 |
| Average | 94.0   | 6.0   | 93.1 | 6.9   | 85.0    | 15.0 | 83.0 | 17.0 | 85.5    | 14.5 | 83.5 | 16.5 |
| RSD     | 0.3%   | 4.7%  | 0.3% | 4.7%  | 0.3%    | 1.6% | 0.3% | 1.6% | 0.0%    | 0.0% | 0.0% | 0.0% |

Table S5. Summary of monomeric ratios obtained for PHBV5 using <sup>1</sup>H NMR at 60 MHz, 100 MHz, and 400 MHz. The ratios are shown both as mol% and wt%. Three assays were prepared and analyzed for each polymer. The averages of triplicate analyses are included for each assay, in addition to the relative standard deviations (RSD).

| PHBV5   | 60 MHz |      |      |      | 100 MHz |      |      |      | 400 MHz |      |      |      |
|---------|--------|------|------|------|---------|------|------|------|---------|------|------|------|
|         | mol%   |      | wt%  |      | mol%    |      | wt%  |      | mol%    |      | wt%  |      |
|         | 3HB    | 3HV  | 3HB  | 3HV  | 3HB     | 3HV  | 3HB  | 3HV  | 3HB     | 3HV  | 3HB  | 3HV  |
| Assay 1 | 95.6   | 4.4  | 94.9 | 5.1  | 89.1    | 10.9 | 87.6 | 12.4 | 89.1    | 10.9 | 87.6 | 12.4 |
|         | 95.5   | 4.5  | 94.8 | 5.2  | 88.5    | 11.5 | 86.9 | 13.1 | 89.2    | 10.8 | 87.7 | 12.3 |
|         | 95.5   | 4.5  | 94.8 | 5.2  | 88.2    | 11.8 | 86.6 | 13.4 | 89.1    | 10.9 | 87.6 | 12.4 |
| Average | 95.5   | 4.5  | 94.8 | 5.2  | 88.6    | 11.4 | 87.0 | 13.0 | 89.1    | 10.9 | 87.6 | 12.4 |
| RSD     | 0.0%   | 1.1% | 0.1% | 1.0% | 0.4%    | 3.3% | 0.5% | 3.2% | 0.1%    | 0.4% | 0.1% | 0.4% |
| Assay 2 | 95.1   | 4.9  | 94.4 | 5.6  | 88.6    | 11.4 | 87.0 | 13.0 | 89.2    | 10.8 | 87.7 | 12.3 |
|         | 95.6   | 4.4  | 94.9 | 5.1  | 88.4    | 11.6 | 86.8 | 13.2 | 89.2    | 10.8 | 87.7 | 12.3 |
|         | 95.6   | 4.4  | 94.9 | 5.1  | 88.6    | 11.4 | 87.0 | 13.0 | 89.2    | 10.8 | 87.7 | 12.3 |
| Average | 95.4   | 4.6  | 94.7 | 5.3  | 88.5    | 11.5 | 86.9 | 13.1 | 89.2    | 10.8 | 87.7 | 12.3 |
| RSD     | 0.2%   | 5.2% | 0.3% | 5.1% | 0.1%    | 0.8% | 0.1% | 0.8% | 0.0%    | 0.0% | 0.0% | 0.0% |
| Assay 3 | 95.7   | 4.3  | 95.0 | 5.0  | 88.5    | 11.5 | 86.9 | 13.1 | 89.2    | 10.8 | 87.7 | 12.3 |
|         | 95.5   | 4.5  | 94.8 | 5.2  | 88.4    | 11.6 | 86.8 | 13.2 | 89.1    | 10.9 | 87.6 | 12.4 |
|         | 95.5   | 4.5  | 94.8 | 5.2  | 88.3    | 11.7 | 86.7 | 13.3 | 89.2    | 10.8 | 87.7 | 12.3 |
| Average | 95.6   | 4.4  | 94.9 | 5.1  | 88.4    | 11.6 | 86.8 | 13.2 | 89.2    | 10.8 | 87.6 | 12.4 |
| RSD     | 0.1%   | 2.1% | 0.1% | 2.1% | 0.1%    | 0.7% | 0.1% | 0.7% | 0.1%    | 0.4% | 0.1% | 0.4% |

Table S6. Summary of monomeric ratios obtained for PHBV6 using <sup>1</sup>H NMR at 60 MHz, 100 MHz, and 400 MHz. The ratios are shown both as mol% and wt%. Three assays were prepared and analyzed for each polymer. The averages of triplicate analyses are included for each assay, in addition to the relative standard deviations (RSD).

| PHBV6   | 60 MHz |      |      |      | 100 MHz |      |      |      | 400 MHz |      |      |      |
|---------|--------|------|------|------|---------|------|------|------|---------|------|------|------|
|         | mol%   |      | wt%  |      | mol%    |      | wt%  |      | mol%    |      | wt%  |      |
|         | 3HB    | 3HV  | 3HB  | 3HV  | 3HB     | 3HV  | 3HB  | 3HV  | 3HB     | 3HV  | 3HB  | 3HV  |
| Assay 1 | 78.5   | 21.5 | 75.9 | 24.1 | 81.0    | 19.0 | 78.6 | 21.4 | 81.0    | 19.0 | 78.6 | 21.4 |
|         | 80.0   | 20.0 | 77.5 | 22.5 | 80.6    | 19.4 | 78.2 | 21.8 | 80.9    | 19.1 | 78.5 | 21.5 |
|         | 79.8   | 20.2 | 77.3 | 22.7 | 80.7    | 19.3 | 78.3 | 21.7 | 80.9    | 19.1 | 78.5 | 21.5 |
| Average | 79.4   | 20.6 | 76.9 | 23.1 | 80.8    | 19.2 | 78.3 | 21.7 | 80.9    | 19.1 | 78.5 | 21.5 |
| RSD     | 0.8%   | 3.2% | 0.9% | 3.1% | 0.2%    | 0.9% | 0.2% | 0.9% | 0.1%    | 0.2% | 0.1% | 0.2% |
| Assay 2 | 80.6   | 19.4 | 78.2 | 21.8 | 81.2    | 18.8 | 78.8 | 21.2 | 80.8    | 19.2 | 78.4 | 21.6 |
|         | 79.9   | 20.1 | 77.4 | 22.6 | 80.7    | 19.3 | 78.3 | 21.7 | 80.7    | 19.3 | 78.3 | 21.7 |
|         | 80.8   | 19.2 | 78.4 | 21.6 | 80.7    | 19.3 | 78.3 | 21.7 | 80.8    | 19.2 | 78.4 | 21.6 |
| Average | 80.4   | 19.6 | 78.0 | 22.0 | 80.9    | 19.1 | 78.4 | 21.6 | 80.8    | 19.2 | 78.3 | 21.7 |
| RSD     | 0.5%   | 2.0% | 0.5% | 1.9% | 0.3%    | 1.2% | 0.3% | 1.2% | 0.1%    | 0.2% | 0.1% | 0.2% |
| Assay 3 | 80.2   | 19.8 | 77.7 | 22.3 | 80.5    | 19.5 | 78.0 | 22.0 | 80.9    | 19.1 | 78.5 | 21.5 |
|         | 79.9   | 20.1 | 77.4 | 22.6 | 80.9    | 19.1 | 78.5 | 21.5 | 80.8    | 19.2 | 78.4 | 21.6 |
|         | 80.0   | 20.0 | 77.5 | 22.5 | 80.9    | 19.1 | 78.5 | 21.5 | 80.9    | 19.1 | 78.5 | 21.5 |
| Average | 80.0   | 20.0 | 77.5 | 22.5 | 80.8    | 19.2 | 78.3 | 21.7 | 80.9    | 19.1 | 78.4 | 21.6 |
| RSD     | 0.2%   | 0.6% | 0.2% | 0.6% | 0.2%    | 1.0% | 0.3% | 1.0% | 0.1%    | 0.2% | 0.1% | 0.2% |

Table S7. Summary of monomeric ratios obtained for PHBV7 using <sup>1</sup>H NMR at 60 MHz, 100 MHz, and 400 MHz. The ratios are shown both as mol% and wt%. Three assays were prepared and analyzed for each polymer. The averages of triplicate analyses are included for each assay, in addition to the relative standard deviations (RSD).

| PHBV7   | 60 MHz |      |      |      | 100 MHz |      |      |      | 400 MHz |      |      |      |
|---------|--------|------|------|------|---------|------|------|------|---------|------|------|------|
|         | mol%   |      | wt%  |      | mol%    |      | wt%  |      | mol%    |      | wt%  |      |
|         | 3HB    | 3HV  | 3HB  | 3HV  | 3HB     | 3HV  | 3HB  | 3HV  | 3HB     | 3HV  | 3HB  | 3HV  |
| Assay 1 | 76.5   | 23.5 | 73.7 | 26.3 | 77.8    | 22.2 | 75.1 | 24.9 | 77.5    | 22.5 | 74.8 | 25.2 |
|         | 76.2   | 23.8 | 73.4 | 26.6 | 77.9    | 22.1 | 75.3 | 24.7 | 77.6    | 22.4 | 74.9 | 25.1 |
|         | 76.2   | 23.8 | 73.4 | 26.6 | 77.9    | 22.1 | 75.2 | 24.8 | 77.6    | 22.4 | 74.9 | 25.1 |
| Average | 76.3   | 23.7 | 73.5 | 26.5 | 77.9    | 22.1 | 75.2 | 24.8 | 77.6    | 22.4 | 74.9 | 25.1 |
| RSD     | 0.2%   | 0.6% | 0.2% | 0.6% | 0.1%    | 0.3% | 0.1% | 0.2% | 0.1%    | 0.2% | 0.1% | 0.2% |
| Assay 2 | 75.4   | 24.6 | 72.5 | 27.5 | 78.1    | 21.9 | 75.4 | 24.6 | 77.9    | 22.1 | 75.2 | 24.8 |
|         | 75.2   | 24.8 | 72.3 | 27.7 | 78.5    | 21.5 | 75.9 | 24.1 | 77.9    | 22.1 | 75.2 | 24.8 |
|         | 75.3   | 24.7 | 72.4 | 27.6 | 78.4    | 21.6 | 75.8 | 24.2 | 77.8    | 22.2 | 75.1 | 24.9 |
| Average | 75.3   | 24.7 | 72.4 | 27.6 | 78.3    | 21.7 | 75.7 | 24.3 | 77.9    | 22.1 | 75.2 | 24.8 |
| RSD     | 0.1%   | 0.3% | 0.1% | 0.3% | 0.2%    | 0.8% | 0.2% | 0.8% | 0.1%    | 0.2% | 0.1% | 0.2% |
| Assay 3 | 75.8   | 24.2 | 73.0 | 27.0 | 77.9    | 22.1 | 75.2 | 24.8 | 77.6    | 22.4 | 74.9 | 25.1 |
|         | 76.2   | 23.8 | 73.4 | 26.6 | 77.9    | 22.1 | 75.2 | 24.8 | 77.5    | 22.5 | 74.8 | 25.2 |
|         | 75.7   | 24.3 | 72.8 | 27.2 | 77.9    | 22.1 | 75.2 | 24.8 | 77.6    | 22.4 | 74.9 | 25.1 |
| Average | 75.9   | 24.1 | 73.1 | 26.9 | 77.9    | 22.1 | 75.2 | 24.8 | 77.6    | 22.4 | 74.9 | 25.1 |
| RSD     | 0.3%   | 0.9% | 0.3% | 0.9% | 0.0%    | 0.0% | 0.0% | 0.0% | 0.1%    | 0.2% | 0.1% | 0.2% |



Table S8. Summary of monomeric ratios obtained for PHBV8 using <sup>1</sup>H NMR at 60 MHz, 100 MHz, and 400 MHz. The ratios are shown both as mol% and wt%. Three assays were prepared and analyzed for each polymer. The averages of triplicate analyses are included for each assay, in addition to the relative standard deviations (RSD).

| PHBV8   | 60 MHz |      |      |      | 100 MHz |      |      |      | 400 MHz |      |      |      |
|---------|--------|------|------|------|---------|------|------|------|---------|------|------|------|
|         | mol%   |      | wt%  |      | mol%    |      | wt%  |      | mol%    |      | wt%  |      |
|         | 3HB    | 3HV  | 3HB  | 3HV  | 3HB     | 3HV  | 3HB  | 3HV  | 3HB     | 3HV  | 3HB  | 3HV  |
| Assay 1 | 60.4   | 39.6 | 56.8 | 43.2 | 61.3    | 38.7 | 57.7 | 42.3 | 61.1    | 38.9 | 57.5 | 42.5 |
|         | 60.5   | 39.5 | 56.9 | 43.1 | 61.0    | 39.0 | 57.4 | 42.6 | 61.2    | 38.8 | 57.6 | 42.4 |
|         | 60.7   | 39.3 | 57.1 | 42.9 | 61.2    | 38.8 | 57.6 | 42.4 | 61.0    | 39.0 | 57.4 | 42.6 |
| Average | 60.5   | 39.5 | 56.9 | 43.1 | 61.2    | 38.8 | 57.6 | 42.4 | 61.1    | 38.9 | 57.5 | 42.5 |
| RSD     | 0.2%   | 0.3% | 0.2% | 0.3% | 0.2%    | 0.3% | 0.2% | 0.3% | 0.1%    | 0.2% | 0.1% | 0.2% |
| Assay 2 | 62.9   | 37.1 | 59.3 | 40.7 | 62.0    | 38.0 | 58.4 | 41.6 | 61.4    | 38.6 | 57.8 | 42.2 |
|         | 62.8   | 37.2 | 59.2 | 40.8 | 61.8    | 38.2 | 58.2 | 41.8 | 61.4    | 38.6 | 57.8 | 42.2 |
|         | 62.6   | 37.4 | 59.0 | 41.0 | 61.8    | 38.2 | 58.2 | 41.8 | 61.5    | 38.5 | 57.9 | 42.1 |
| Average | 62.8   | 37.2 | 59.2 | 40.8 | 61.9    | 38.1 | 58.3 | 41.7 | 61.4    | 38.6 | 57.8 | 42.2 |
| RSD     | 0.2%   | 0.3% | 0.2% | 0.3% | 0.2%    | 0.2% | 0.2% | 0.2% | 0.1%    | 0.1% | 0.1% | 0.1% |
| Assay 3 | 60.6   | 39.4 | 57.0 | 43.0 | 60.7    | 39.3 | 57.1 | 42.9 | 60.7    | 39.3 | 57.1 | 42.9 |
|         | 60.7   | 39.3 | 57.1 | 42.9 | 61.0    | 39.0 | 57.4 | 42.6 | 60.7    | 39.3 | 57.1 | 42.9 |
|         | 59.9   | 40.1 | 56.3 | 43.7 | 60.8    | 39.2 | 57.2 | 42.8 | 60.7    | 39.3 | 57.1 | 42.9 |
| Average | 60.4   | 39.6 | 56.8 | 43.2 | 60.8    | 39.2 | 57.2 | 42.8 | 60.7    | 39.3 | 57.1 | 42.9 |
| RSD     | 0.6%   | 0.9% | 0.6% | 0.8% | 0.2%    | 0.3% | 0.2% | 0.3% | 0.0%    | 0.0% | 0.0% | 0.0% |

Table S9. Summary of monomeric ratios obtained for PHBV9 using <sup>1</sup>H NMR at 60 MHz, 100 MHz, and 400 MHz. The ratios are shown both as mol% and wt%. Three assays were prepared and analyzed for each polymer. The averages of triplicate analyses are included for each assay, in addition to the relative standard deviations (RSD).

| PHBV9   | 60 MHz |      |      |      | 100 MHz |      |      |      | 400 MHz |      |      |      |
|---------|--------|------|------|------|---------|------|------|------|---------|------|------|------|
|         | mol%   |      | wt%  |      | mol%    |      | wt%  |      | mol%    |      | wt%  |      |
|         | 3HB    | 3HV  | 3HB  | 3HV  | 3HB     | 3HV  | 3HB  | 3HV  | 3HB     | 3HV  | 3HB  | 3HV  |
| Assay 1 | 58.9   | 41.1 | 55.2 | 44.8 | 57.7    | 42.3 | 54.0 | 46.0 | 57.0    | 43.0 | 53.3 | 46.7 |
|         | 59.2   | 40.8 | 55.5 | 44.5 | 57.5    | 42.5 | 53.8 | 46.2 | 57.0    | 43.0 | 53.3 | 46.7 |
|         | 59.4   | 40.6 | 55.7 | 44.3 | 57.2    | 42.8 | 53.5 | 46.5 | 56.8    | 43.2 | 53.1 | 46.9 |
| Average | 59.2   | 40.8 | 55.5 | 44.5 | 57.5    | 42.5 | 53.8 | 46.2 | 56.9    | 43.1 | 53.2 | 46.8 |
| RSD     | 0.3%   | 0.5% | 0.4% | 0.5% | 0.4%    | 0.5% | 0.4% | 0.5% | 0.2%    | 0.2% | 0.2% | 0.2% |
| Assay 2 | 58.4   | 41.6 | 54.7 | 45.3 | 57.5    | 42.5 | 53.8 | 46.2 | 57.1    | 42.9 | 53.4 | 46.6 |
|         | 57.7   | 42.3 | 54.0 | 46.0 | 57.8    | 42.2 | 54.1 | 45.9 | 57.1    | 42.9 | 53.4 | 46.6 |
|         | 58.2   | 41.8 | 54.5 | 45.5 | 57.6    | 42.4 | 53.9 | 46.1 | 57.2    | 42.8 | 53.5 | 46.5 |
| Average | 58.1   | 41.9 | 54.4 | 45.6 | 57.6    | 42.4 | 53.9 | 46.1 | 57.1    | 42.9 | 53.4 | 46.6 |
| RSD     | 0.5%   | 0.7% | 0.6% | 0.7% | 0.2%    | 0.3% | 0.2% | 0.3% | 0.1%    | 0.1% | 0.1% | 0.1% |
| Assay 3 | 59.3   | 40.7 | 55.6 | 44.4 | 57.4    | 42.6 | 53.7 | 46.3 | 57.2    | 42.8 | 53.5 | 46.5 |
|         | 58.6   | 41.4 | 54.9 | 45.1 | 57.6    | 42.4 | 53.9 | 46.1 | 57.2    | 42.8 | 53.5 | 46.5 |
|         | 59.0   | 41.0 | 55.3 | 44.7 | 57.6    | 42.4 | 53.9 | 46.1 | 57.1    | 42.9 | 53.4 | 46.6 |
| Average | 59.0   | 41.0 | 55.3 | 44.7 | 57.5    | 42.5 | 53.8 | 46.2 | 57.2    | 42.8 | 53.5 | 46.5 |
| RSD     | 0.5%   | 0.7% | 0.5% | 0.7% | 0.2%    | 0.2% | 0.2% | 0.2% | 0.1%    | 0.1% | 0.1% | 0.1% |

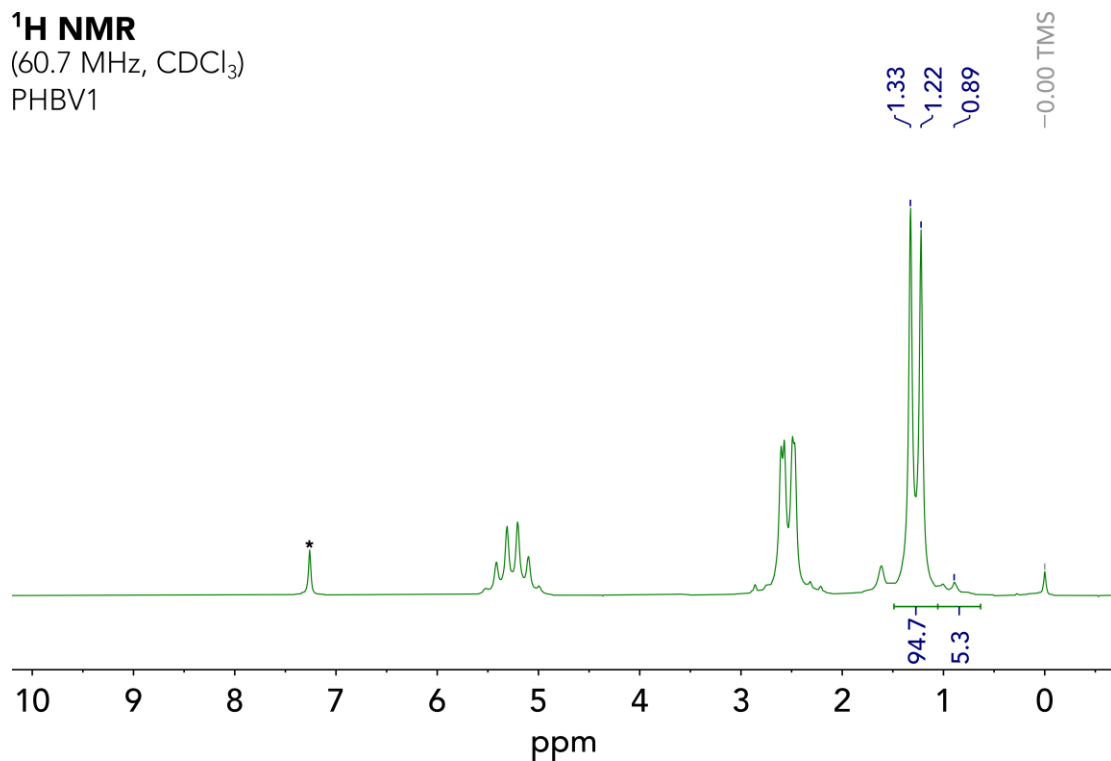

Figure S1. <sup>1</sup>H (60.7 MHz) NMR spectrum of PHBV1 (Assay 1, Run 1) in CDCl<sub>3</sub>. The asterisk represents the residual solvent peak for chloroform. The regions of interest are integrated.

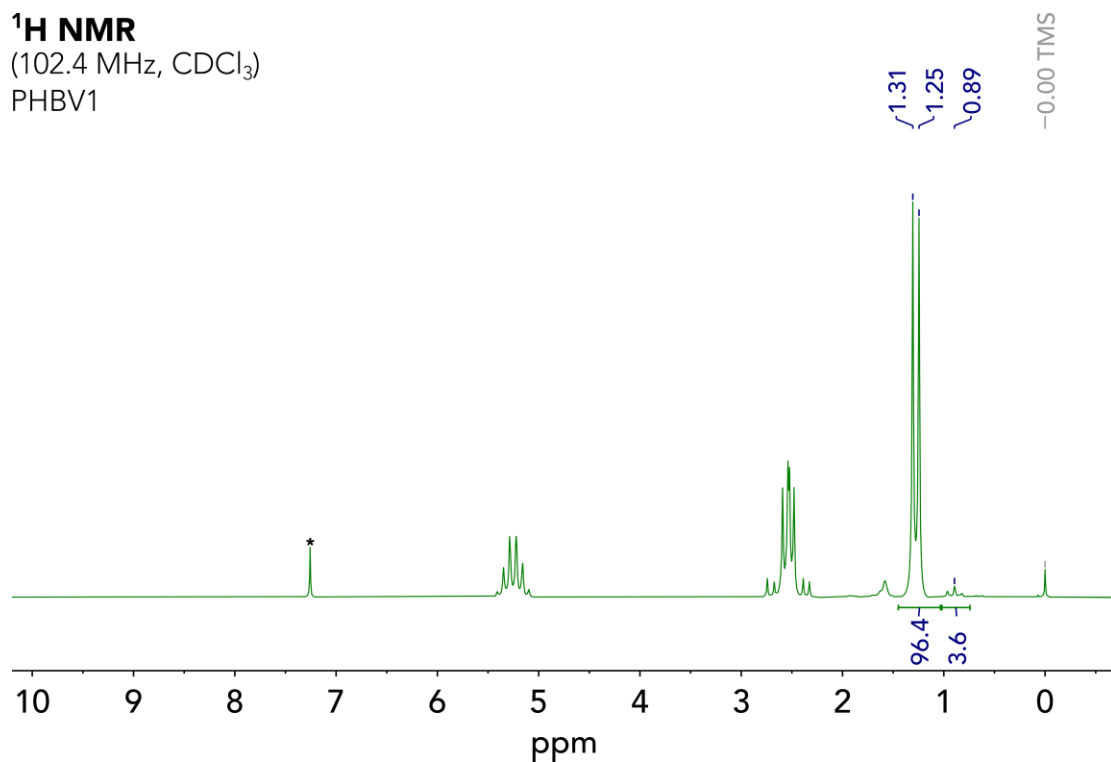

Figure S2. <sup>1</sup>H (102.4 MHz) NMR spectrum of PHBV1 (Assay 1, Run 1) in CDCl<sub>3</sub>. The asterisk represents the residual solvent peak for chloroform. The regions of interest are integrated.

**<sup>1</sup>H NMR**(400.1 MHz, CDCl<sub>3</sub>)

PHBV1

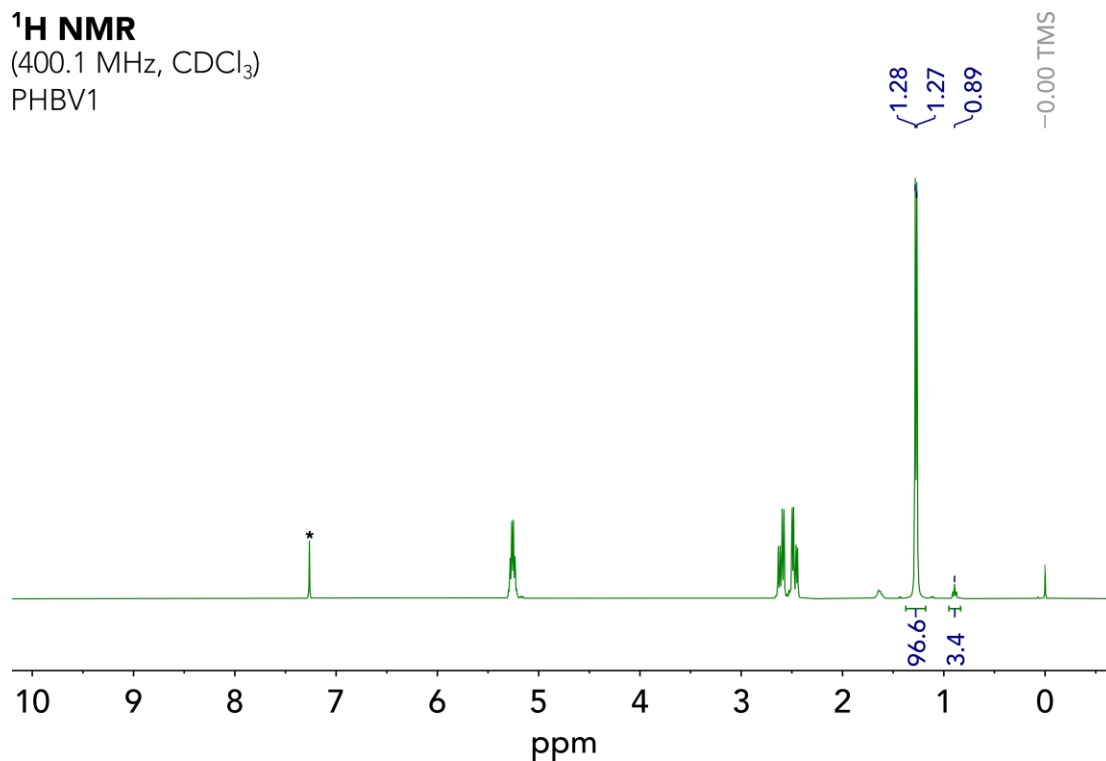

Figure S3. <sup>1</sup>H (400.1 MHz) NMR spectrum of PHBV1 (Assay 1, Run 1) in CDCl<sub>3</sub>. The asterisk represents the residual solvent peak for chloroform. The regions of interest are integrated.

**<sup>1</sup>H NMR**(60.4 MHz, CDCl<sub>3</sub>)

PHBV2

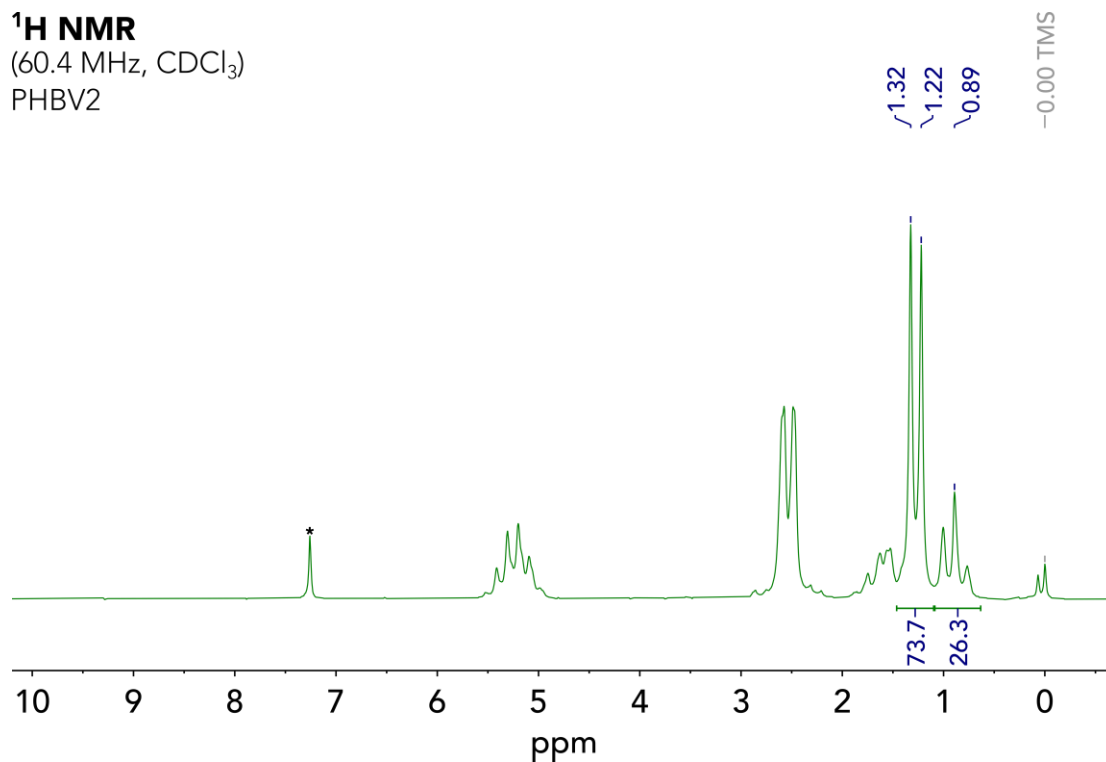

Figure S4. <sup>1</sup>H (60.4 MHz) NMR spectrum of PHBV2 (Assay 1, Run 1) in CDCl<sub>3</sub>. The asterisk represents the residual solvent peak for chloroform. The regions of interest are integrated.

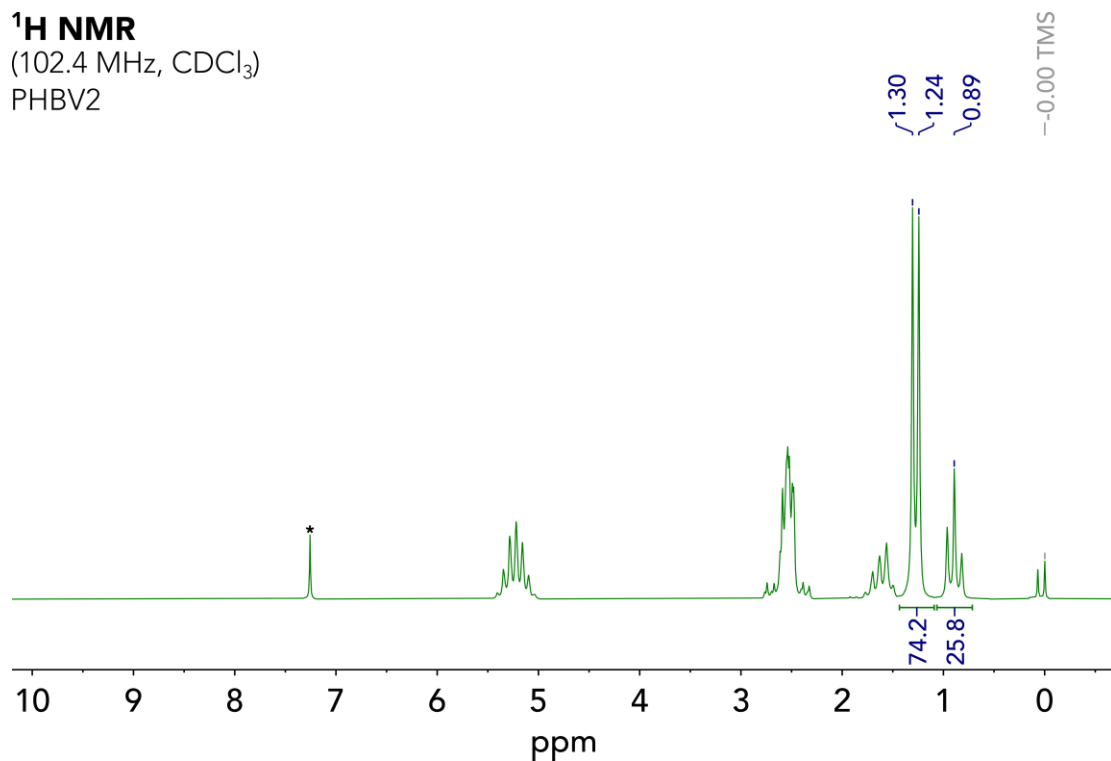

Figure S5. <sup>1</sup>H (102.4 MHz) NMR spectrum of PHBV2 (Assay 1, Run 1) in CDCl<sub>3</sub>. The asterisk represents the residual solvent peak for chloroform. The regions of interest are integrated.

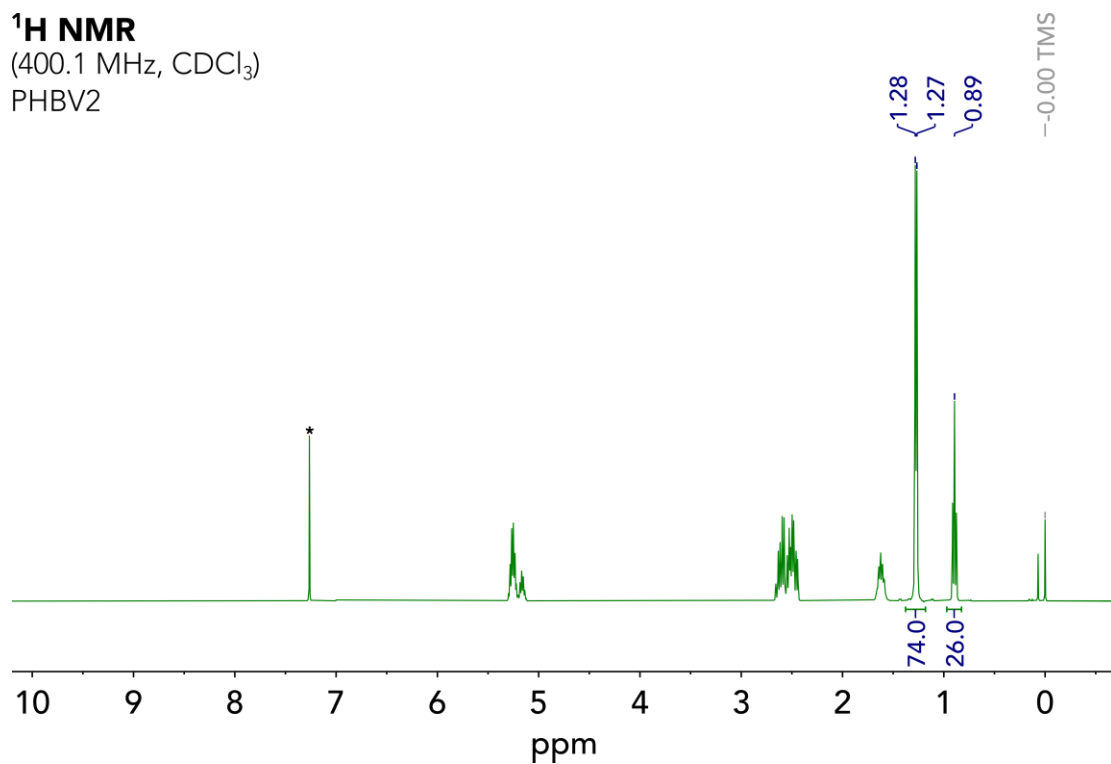

Figure S6. <sup>1</sup>H (400.1 MHz) NMR spectrum of PHBV2 (Assay 1, Run 1) in CDCl<sub>3</sub>. The asterisk represents the residual solvent peak for chloroform. The regions of interest are integrated.

**<sup>1</sup>H NMR**

(60.4 MHz, CDCl<sub>3</sub>)

PHBV3

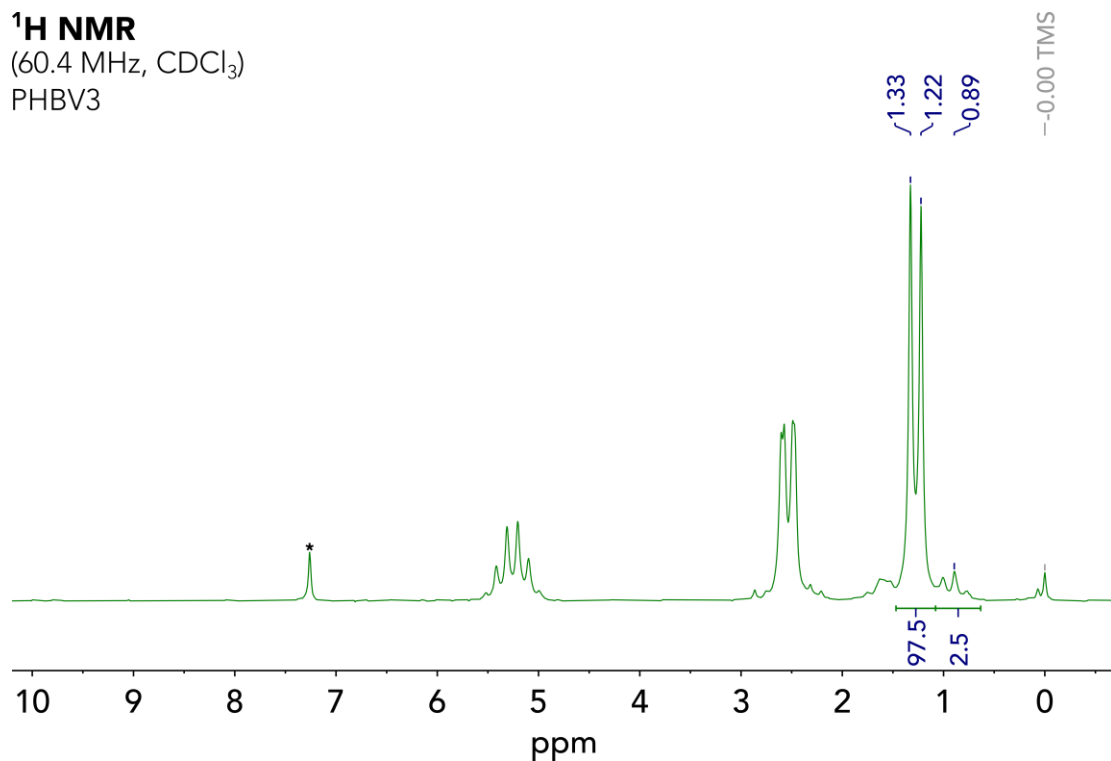

Figure S7. <sup>1</sup>H (60.4 MHz) NMR spectrum of PHBV3 (Assay 1, Run 1) in CDCl<sub>3</sub>. The asterisk represents the residual solvent peak for chloroform. The regions of interest are integrated.

**<sup>1</sup>H NMR**

(102.4 MHz, CDCl<sub>3</sub>)

PHBV3

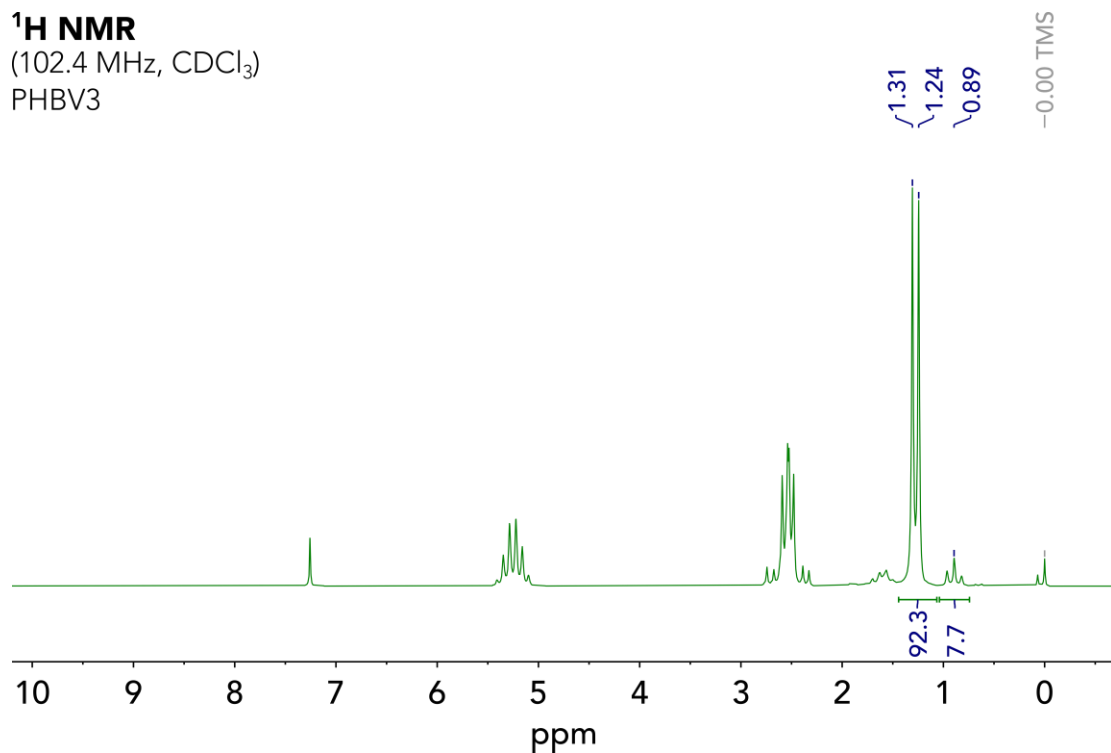

Figure S8. <sup>1</sup>H (102.4 MHz) NMR spectrum of PHBV3 (Assay 1, Run 1) in CDCl<sub>3</sub>. The asterisk represents the residual solvent peak for chloroform. The regions of interest are integrated.

**<sup>1</sup>H NMR**

(400.1 MHz, CDCl<sub>3</sub>)

PHBV3

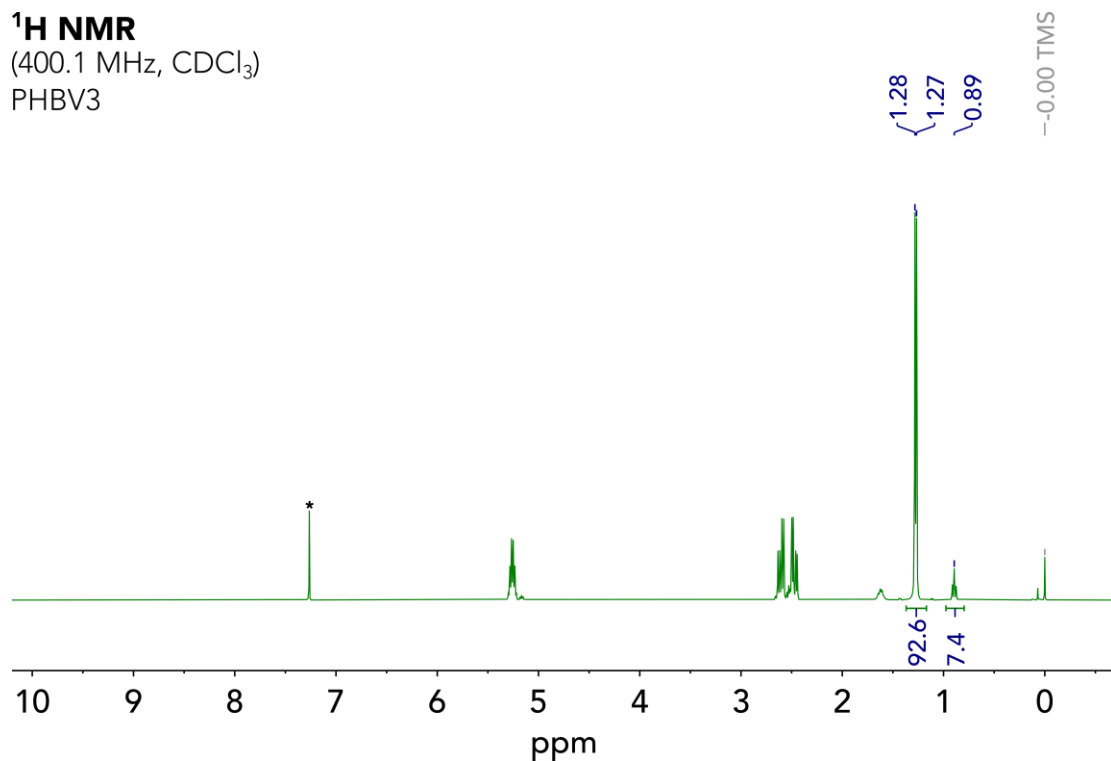

Figure S9. <sup>1</sup>H (400.1 MHz) NMR spectrum of PHBV3 (Assay 1, Run 1) in CDCl<sub>3</sub>. The asterisk represents the residual solvent peak for chloroform. The regions of interest are integrated.

**<sup>1</sup>H NMR**

(60.7 MHz, CDCl<sub>3</sub>)

PHBV4

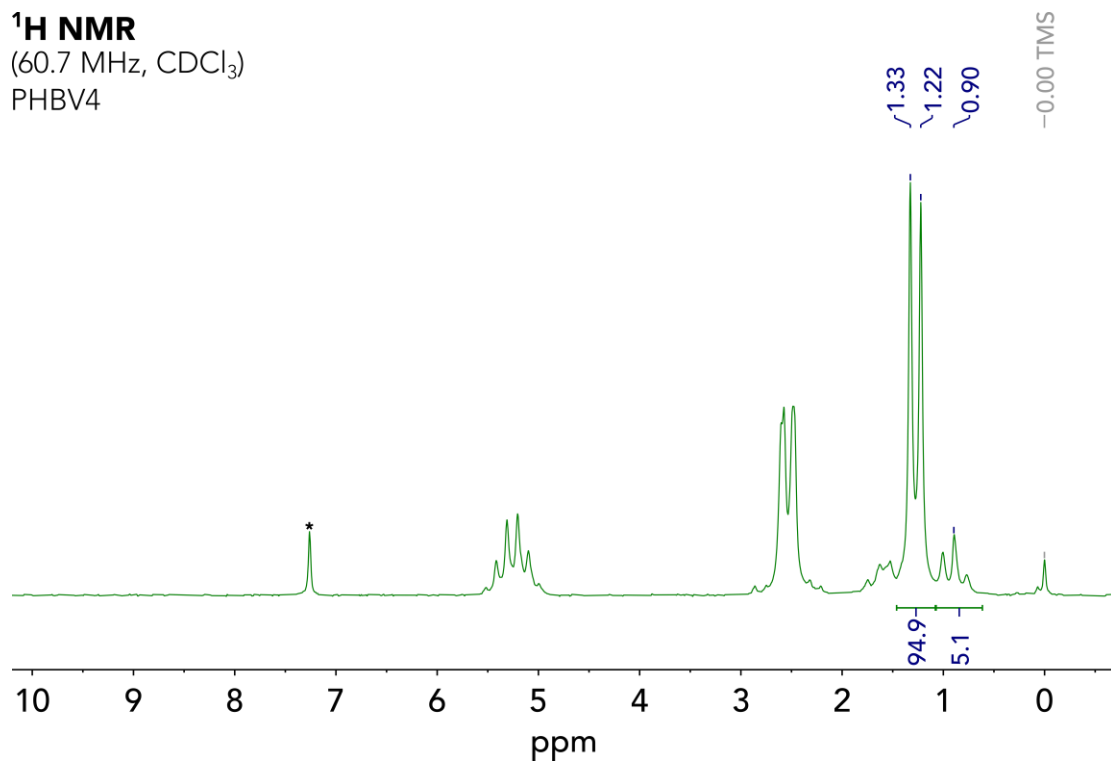

Figure S10. <sup>1</sup>H (60.7 MHz) NMR spectrum of PHBV4 (Assay 1, Run 1) in CDCl<sub>3</sub>. The asterisk represents the residual solvent peak for chloroform. The regions of interest are integrated.

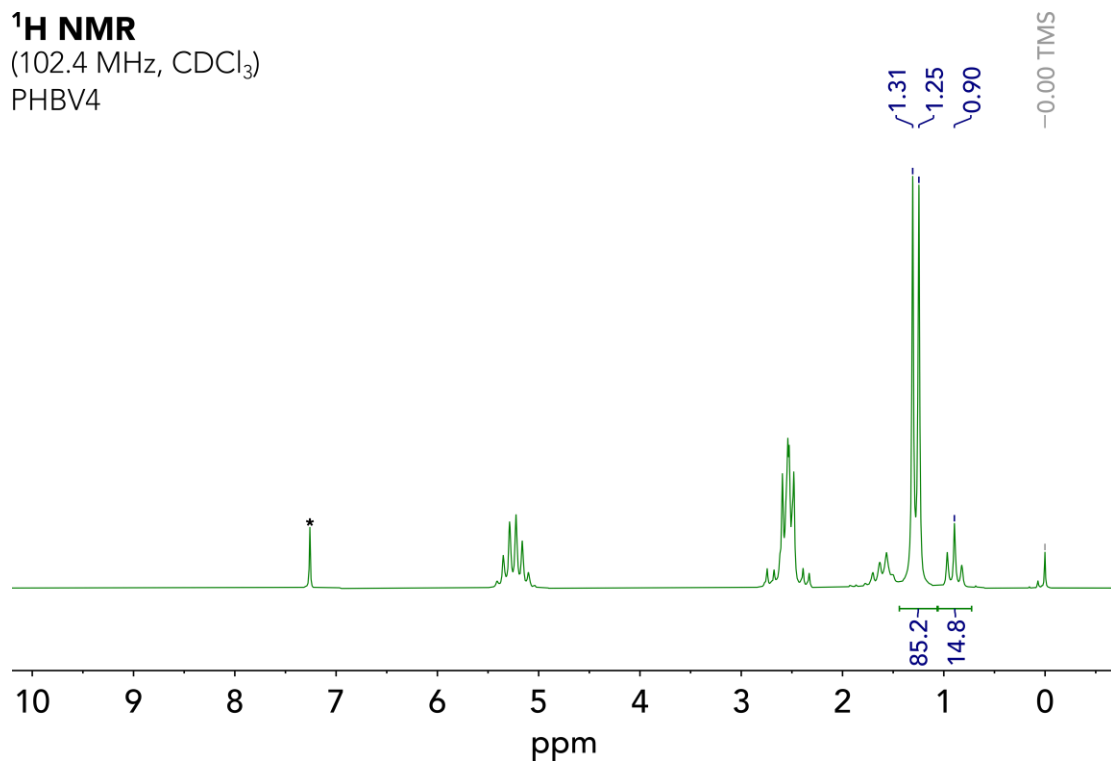

Figure S11. <sup>1</sup>H (102.4 MHz) NMR spectrum of PHBV4 (Assay 1, Run 1) in CDCl<sub>3</sub>. The asterisk represents the residual solvent peak for chloroform. The regions of interest are integrated.

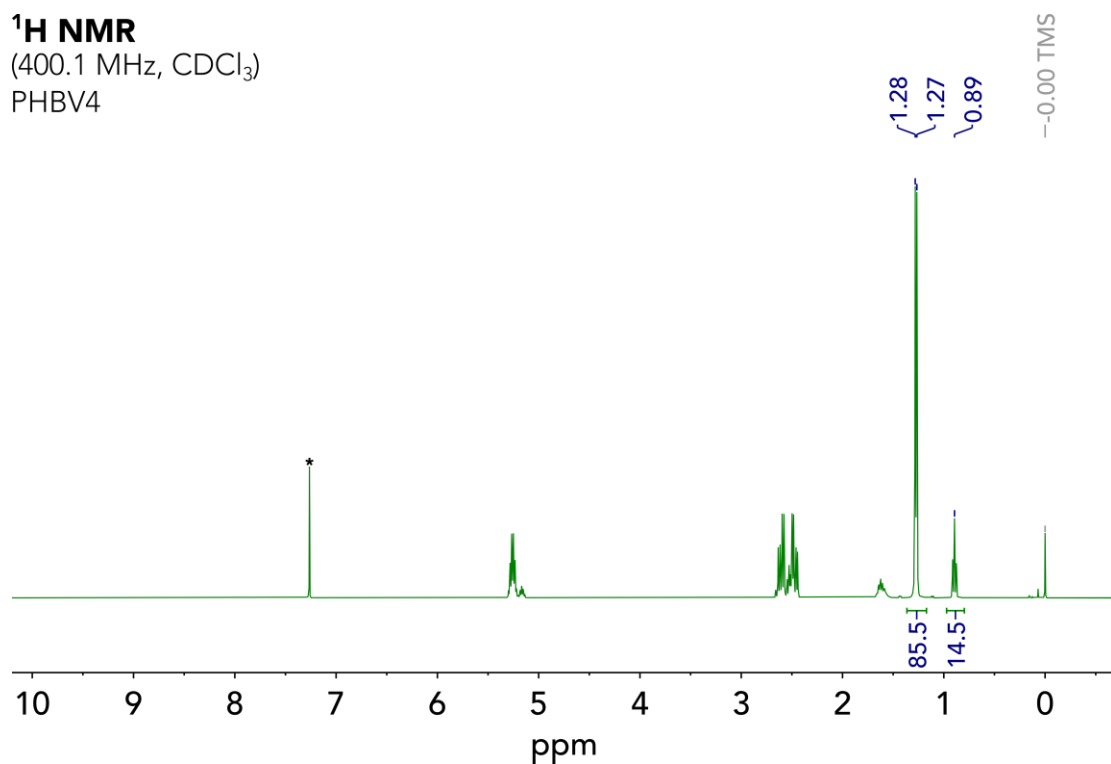

Figure S12. <sup>1</sup>H (400.1 MHz) NMR spectrum of PHBV4 (Assay 1, Run 1) in CDCl<sub>3</sub>. The asterisk represents the residual solvent peak for chloroform. The regions of interest are integrated.



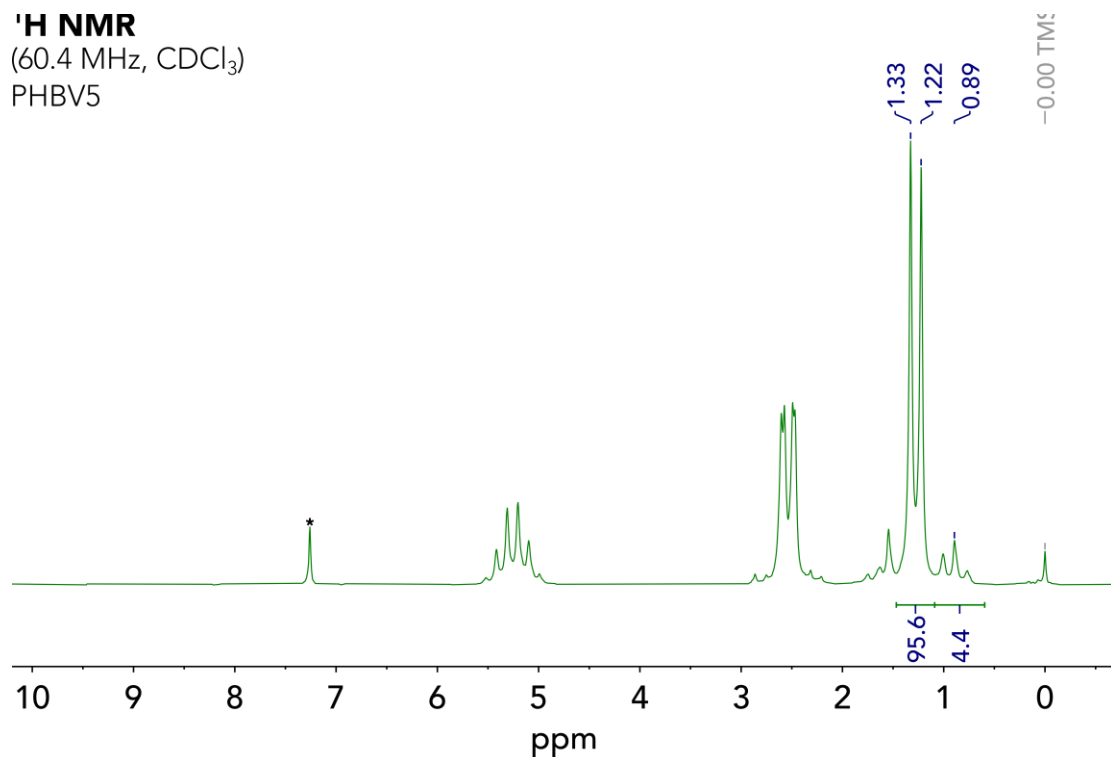

Figure S13. <sup>1</sup>H (60.4 MHz) NMR spectrum of PHBV5 (Assay 1, Run 1) in CDCl<sub>3</sub>. The asterisk represents the residual solvent peak for chloroform. The regions of interest are integrated.

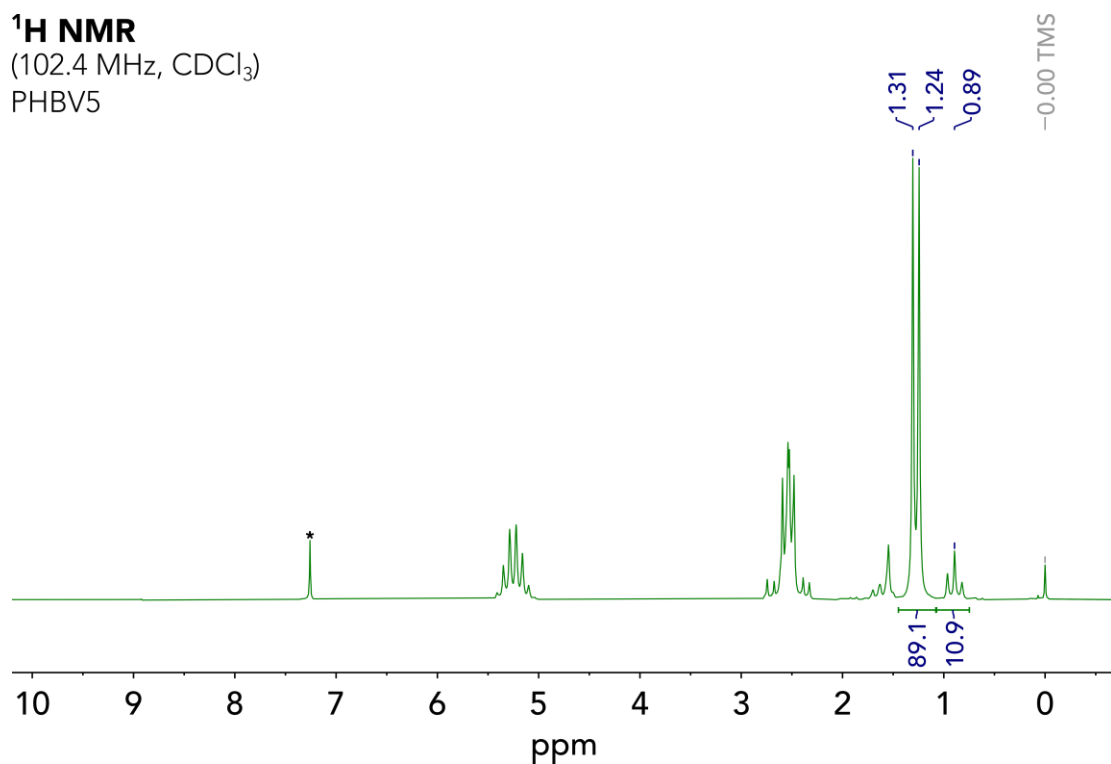

Figure S14. <sup>1</sup>H (102.4 MHz) NMR spectrum of PHBV5 (Assay 1, Run 1) in CDCl<sub>3</sub>. The asterisk represents the residual solvent peak for chloroform. The regions of interest are integrated.

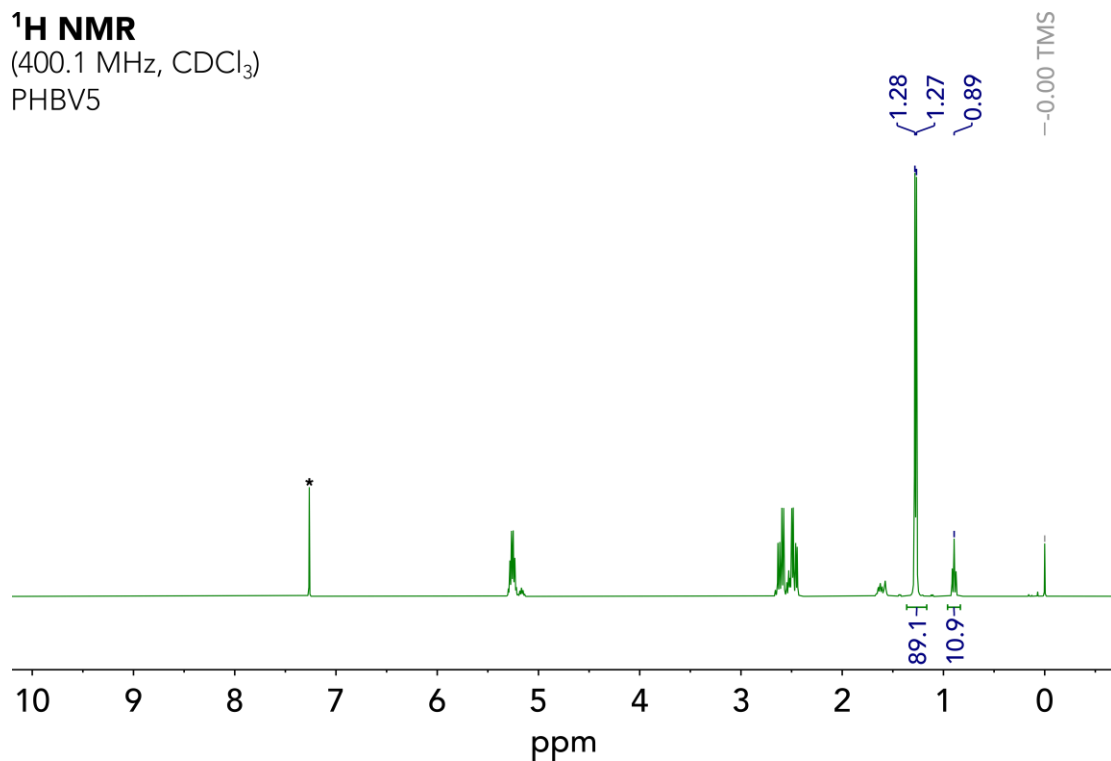

Figure S15. <sup>1</sup>H (400.1 MHz) NMR spectrum of PHBV5 (Assay 1, Run 1) in CDCl<sub>3</sub>. The asterisk represents the residual solvent peak for chloroform. The regions of interest are integrated.

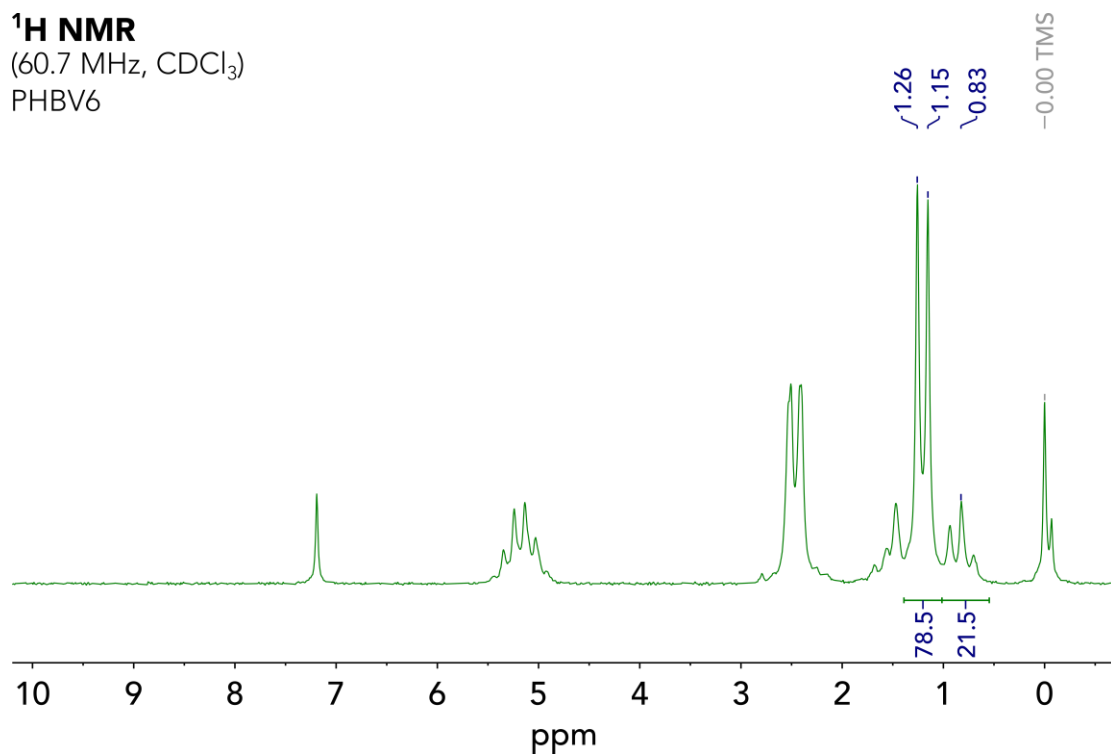

Figure S16. <sup>1</sup>H (60.7 MHz) NMR spectrum of PHBV6 (Assay 1, Run 1) in CDCl<sub>3</sub>. The asterisk represents the residual solvent peak for chloroform. The regions of interest are integrated.

**<sup>1</sup>H NMR**

(102.6 MHz, CDCl<sub>3</sub>)

PHBV6

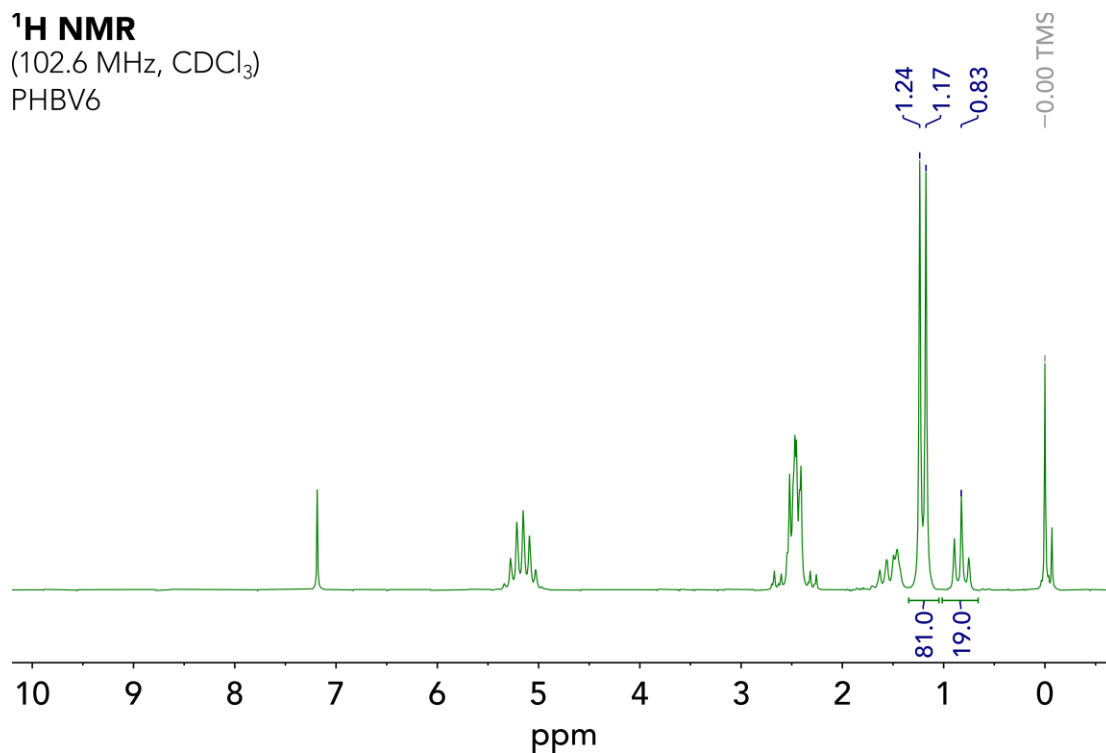

Figure S17. <sup>1</sup>H (102.6 MHz) NMR spectrum of PHBV6 (Assay 1, Run 1) in CDCl<sub>3</sub>. The asterisk represents the residual solvent peak for chloroform. The regions of interest are integrated.

**<sup>1</sup>H NMR**

(400.1 MHz, CDCl<sub>3</sub>)

PHBV6

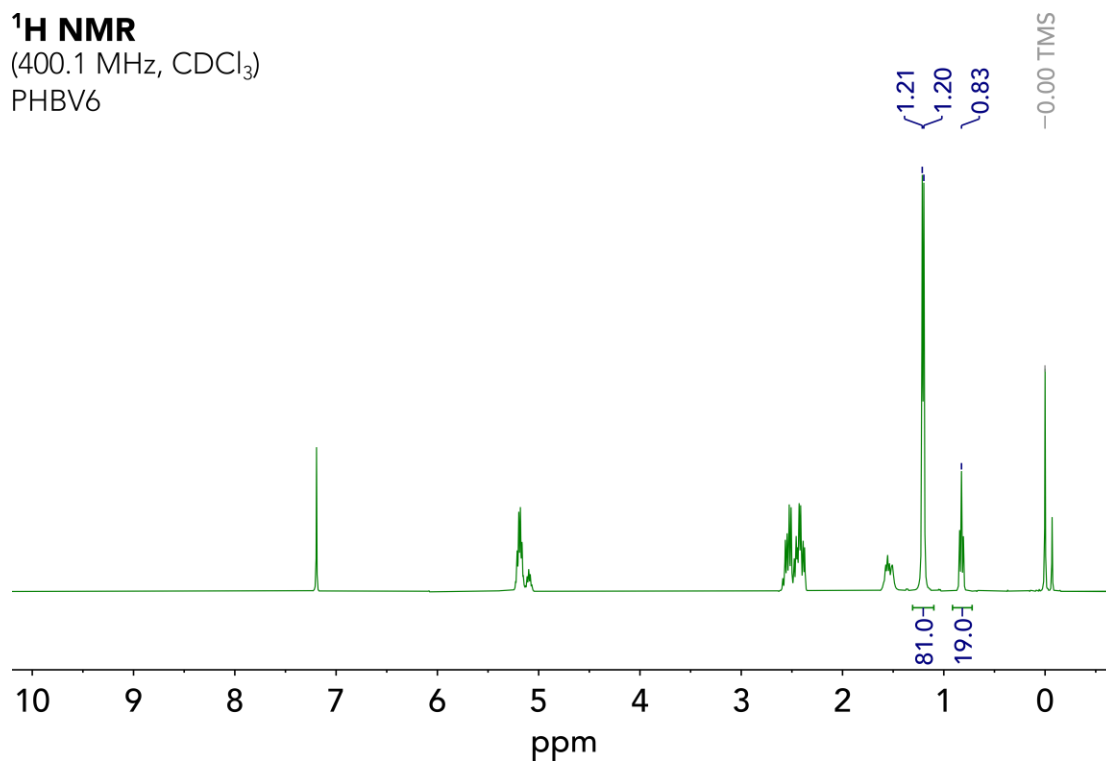

Figure S18. <sup>1</sup>H (400.1 MHz) NMR spectrum of PHBV6 (Assay 1, Run 1) in CDCl<sub>3</sub>. The asterisk represents the residual solvent peak for chloroform. The regions of interest are integrated.

**<sup>1</sup>H NMR**

(59.5 MHz, CDCl<sub>3</sub>)

PHBV7

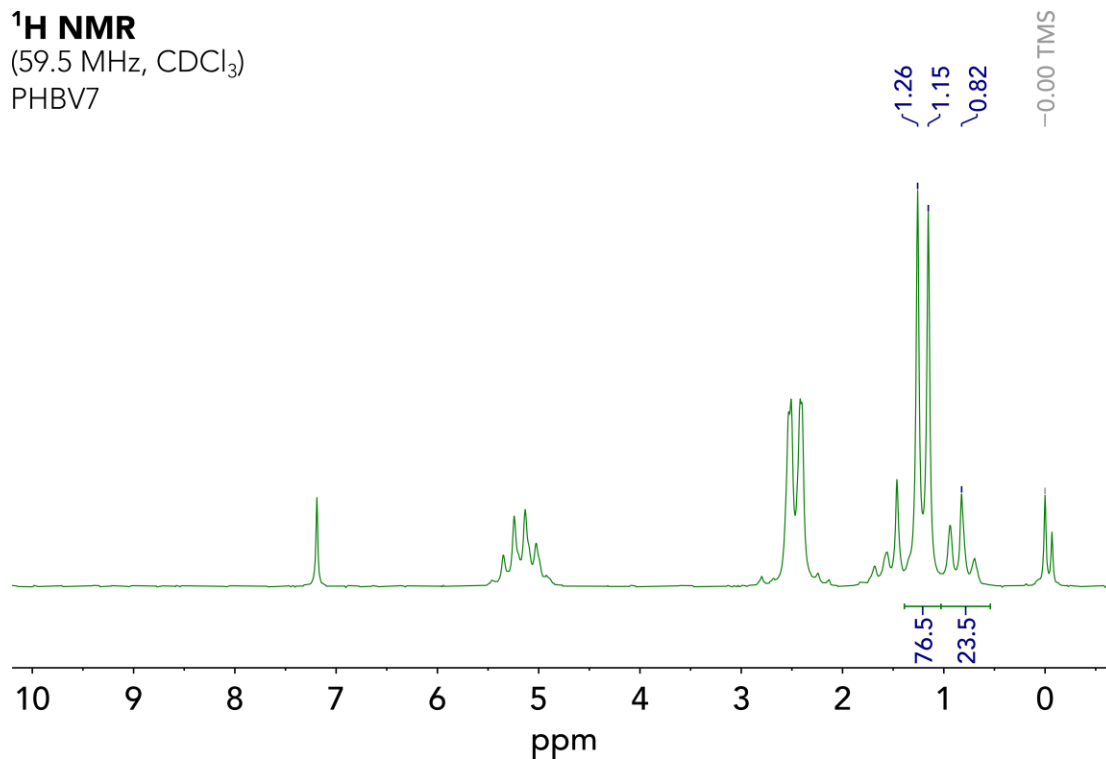

Figure S19. <sup>1</sup>H (59.5 MHz) NMR spectrum of PHBV7 (Assay 1, Run 1) in CDCl<sub>3</sub>. The asterisk represents the residual solvent peak for chloroform. The regions of interest are integrated.

**<sup>1</sup>H NMR**

(102.6 MHz, CDCl<sub>3</sub>)

PHBV7

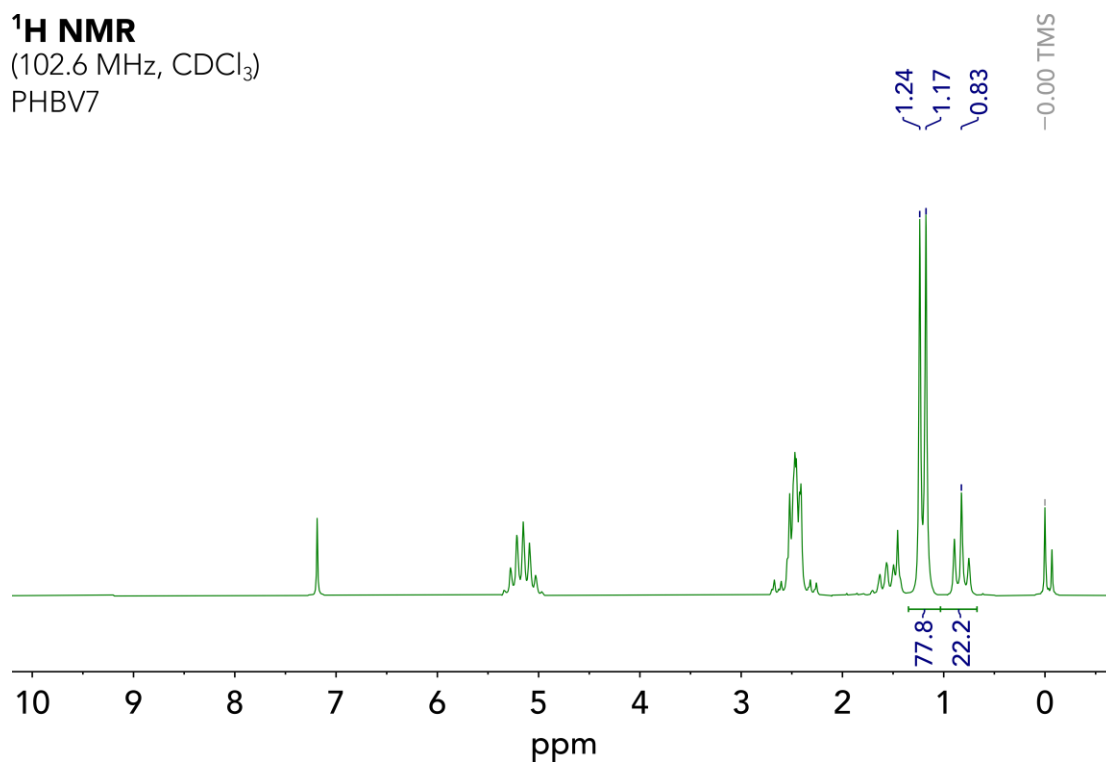

Figure S20. <sup>1</sup>H (102.6 MHz) NMR spectrum of PHBV7 (Assay 1, Run 1) in CDCl<sub>3</sub>. The asterisk represents the residual solvent peak for chloroform. The regions of interest are integrated.

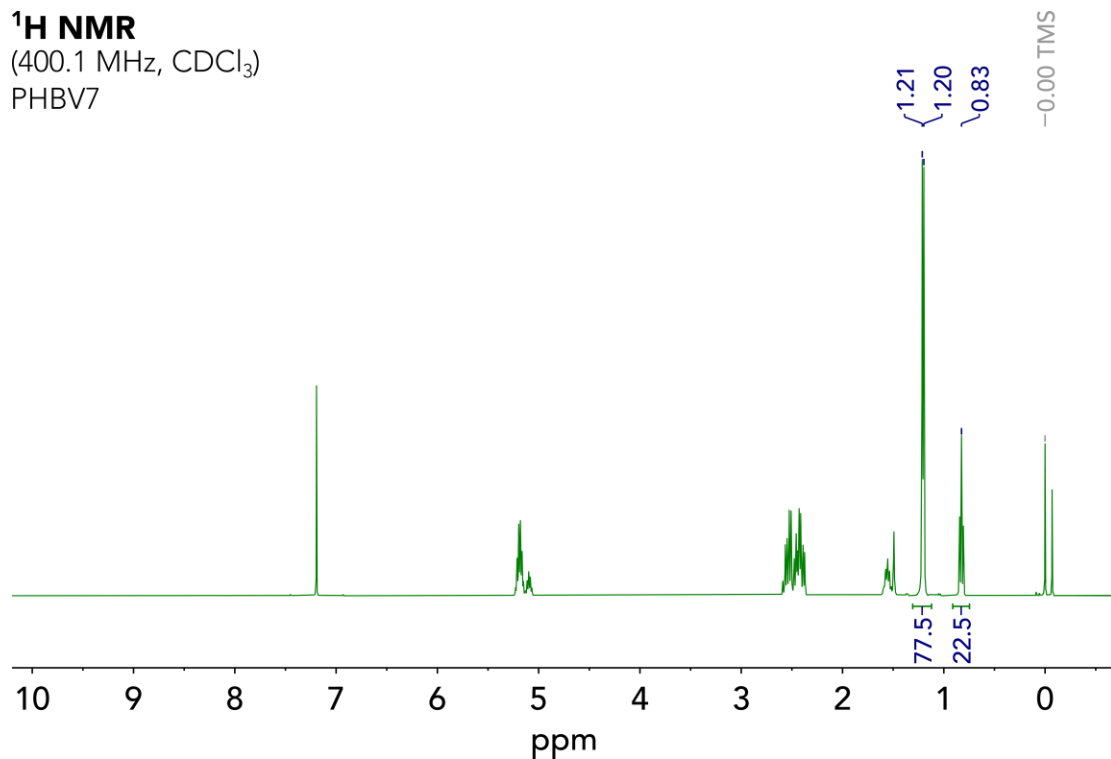

Figure S21. <sup>1</sup>H (400.1 MHz) NMR spectrum of PHBV7 (Assay 1, Run 1) in CDCl<sub>3</sub>. The asterisk represents the residual solvent peak for chloroform. The regions of interest are integrated.

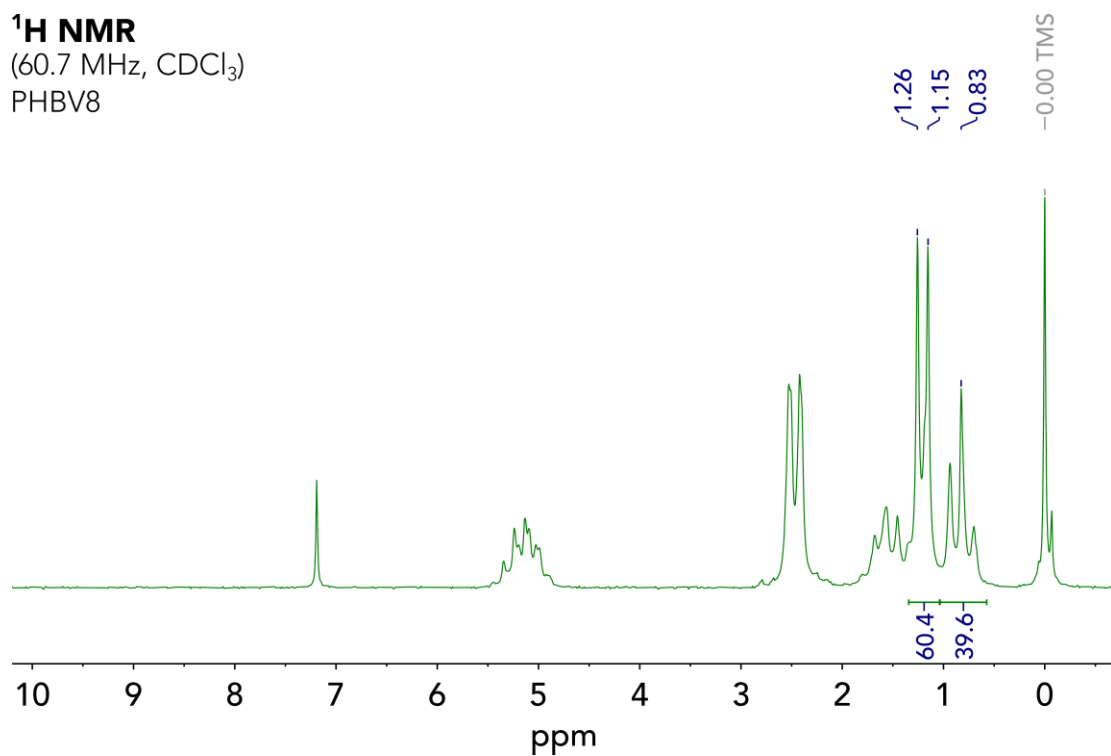

Figure S22. <sup>1</sup>H (60.7 MHz) NMR spectrum of PHBV8 (Assay 1, Run 1) in CDCl<sub>3</sub>. The asterisk represents the residual solvent peak for chloroform. The regions of interest are integrated.

**<sup>1</sup>H NMR**  
(102.6 MHz, CDCl<sub>3</sub>)  
PHBV8

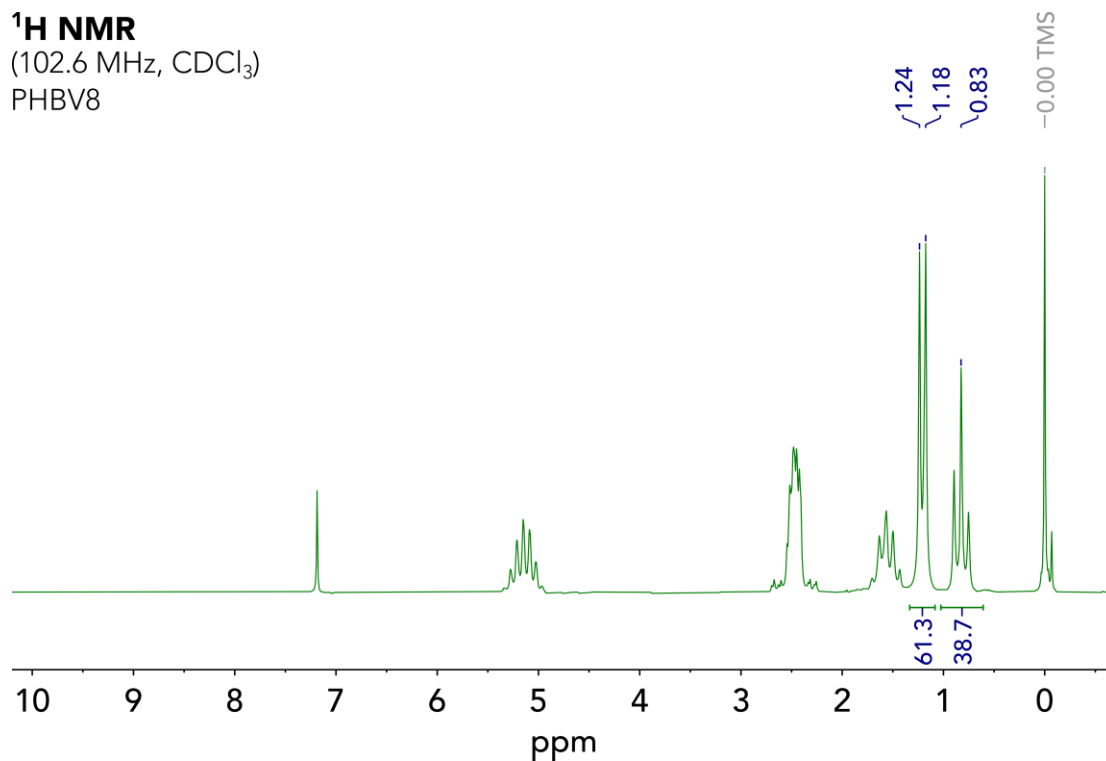

Figure S23. <sup>1</sup>H (102.6 MHz) NMR spectrum of PHBV8 (Assay 1, Run 1) in CDCl<sub>3</sub>. The asterisk represents the residual solvent peak for chloroform. The regions of interest are integrated.

**<sup>1</sup>H NMR**  
(400.1 MHz, CDCl<sub>3</sub>)  
PHBV8

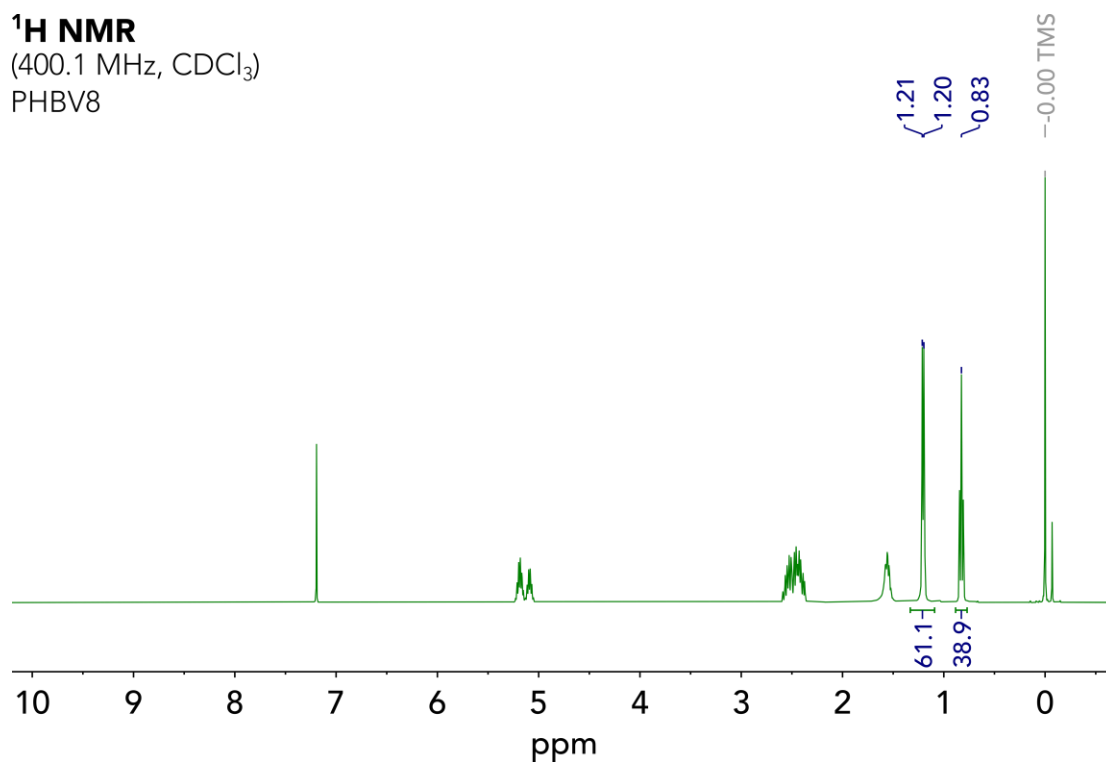

Figure S24. <sup>1</sup>H (400.1 MHz) NMR spectrum of PHBV8 (Assay 1, Run 1) in CDCl<sub>3</sub>. The asterisk represents the residual solvent peak for chloroform. The regions of interest are integrated.

**<sup>1</sup>H NMR**  
(60.4 MHz, CDCl<sub>3</sub>)  
PHBV9

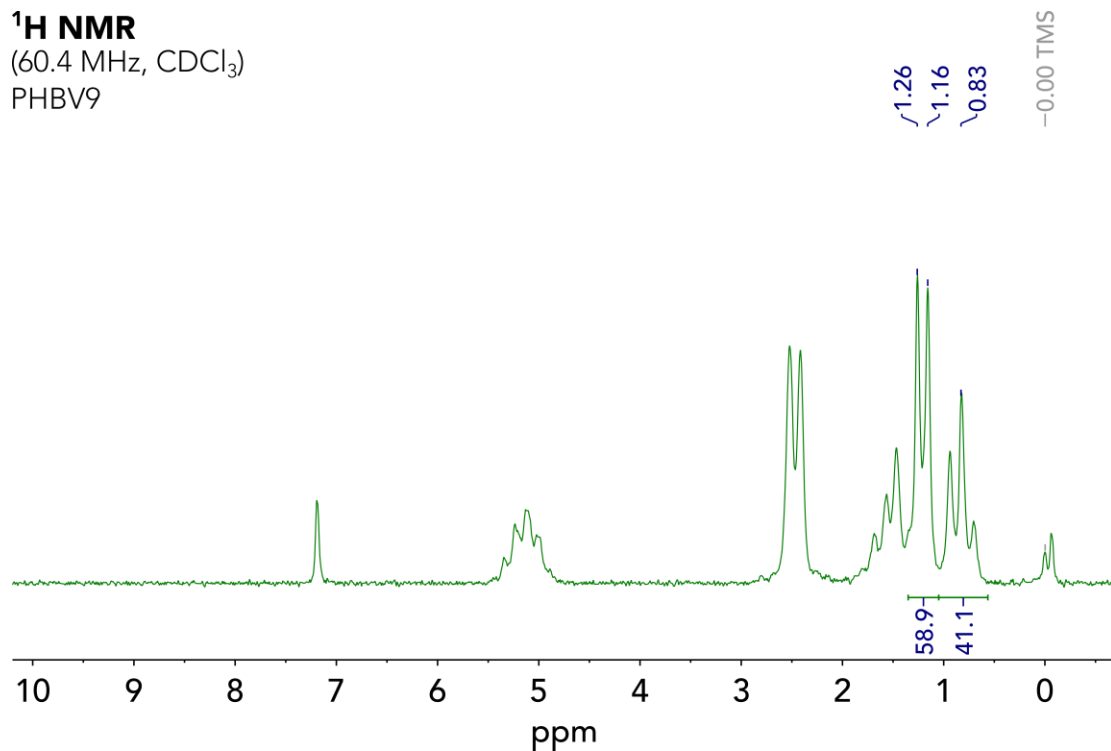

Figure S25. <sup>1</sup>H (60.4 MHz) NMR spectrum of PHBV9 (Assay 1, Run 1) in CDCl<sub>3</sub>. The asterisk represents the residual solvent peak for chloroform. The regions of interest are integrated.

**<sup>1</sup>H NMR**  
(102.6 MHz, CDCl<sub>3</sub>)  
PHBV9

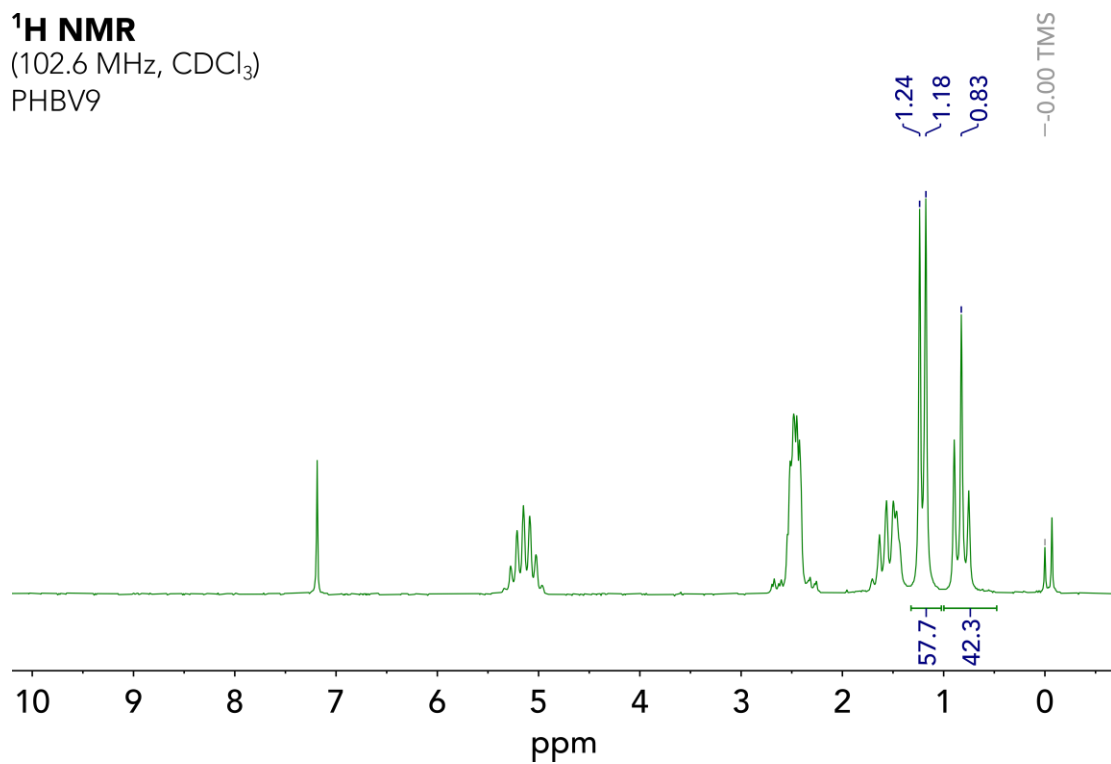

Figure S26. <sup>1</sup>H (102.6 MHz) NMR spectrum of PHBV9 (Assay 1, Run 1) in CDCl<sub>3</sub>. The asterisk represents the residual solvent peak for chloroform. The regions of interest are integrated.

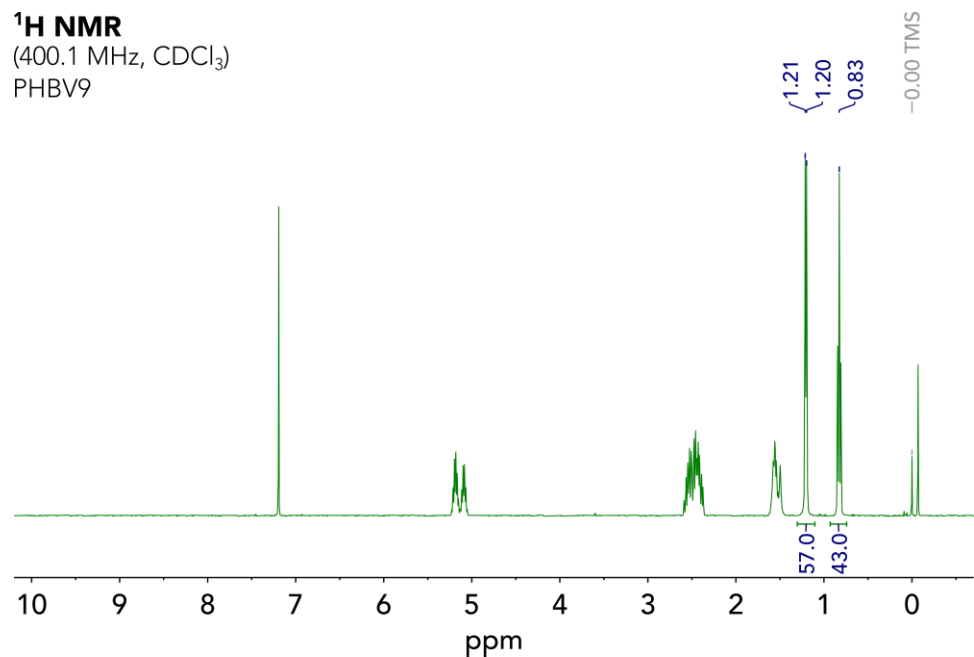

Figure S27. <sup>1</sup>H (400.1 MHz) NMR spectrum of PHBV9 (Assay 1, Run 1) in CDCl<sub>3</sub>. The asterisk represents the residual solvent peak for chloroform. The regions of interest are integrated.
